# Long-term transcriptional activity at zero growth by a cosmopolitan rare biosphere member

[Bela Hausmann](#)<sup>1,2</sup>, [Claus Pelikan](#)<sup>1</sup>, [Thomas Rattei](#)<sup>3</sup>, [Alexander Loy](#)<sup>1\*</sup>, and [Michael Pester](#)<sup>2,4\*</sup>

<sup>1</sup> University of Vienna, Research Network Chemistry meets Microbiology, Department of Microbiology and Ecosystem Science, Division of Microbial Ecology, Vienna, Austria

<sup>2</sup> University of Konstanz, Department of Biology, Konstanz, Germany

<sup>3</sup> University of Vienna, Research Network Chemistry meets Microbiology, Department of Microbiology and Ecosystem Science, Division of Computational Systems Biology, Vienna, Austria

<sup>4</sup> Leibniz Institute DSMZ, Department of Microorganisms, Braunschweig, Germany

\* Correspondence: Alexander Loy, University of Vienna, Research Network Chemistry meets Microbiology, Department of Microbiology and Ecosystem Science, Division of Microbial Ecology, Althanstraße 14, 1090 Vienna, Austria. Phone: +43 1 4277 76605. Fax: +43 1 4277 876605. E-mail: [loy@microbial-ecology.net](mailto:loy@microbial-ecology.net); and Michael Pester, Leibniz Institute DSMZ, Inhoffenstraße 7B, 38124 Braunschweig, Germany. Phone: +49 531 2616 237. Fax: +49 531 2616 418. E-mail: [michael.pesther@dsmz.de](mailto:michael.pesther@dsmz.de).

Running title: *In situ* transcriptome of a rare biosphere member

Keywords: cryptic sulfur cycle | peatland | metatranscriptome | growth arrest | maintenance | keystone species

## 20 Abstract

21 Microbial diversity in the environment is mainly concealed within the rare biosphere (all species  
 22 with <0.1% relative abundance). While dormancy explains a low-abundance state very well,  
 23 the mechanisms leading to rare but active microorganisms remain elusive. We used  
 24 environmental systems biology to genomically and transcriptionally characterise *Candidatus*  
 25 *Desulfosporosinus infrequens*, a low-abundance sulfate reducer cosmopolitan to freshwater  
 26 wetlands, where it contributes to cryptic sulfur cycling. We obtained its near-complete genome  
 27 by metagenomics of acidic peat soil. In addition, we analyzed anoxic peat soil incubated under  
 28 *in situ*-like conditions for 50 days by *Desulfosporosinus*-targeted qPCR and  
 29 metatranscriptomics. The *Desulfosporosinus* population stayed at a constant low abundance  
 30 under all incubation conditions, averaging  $1.2 \times 10^6$  16S rRNA gene copies per cm<sup>3</sup> soil. In  
 31 contrast, transcriptional activity of *Ca. D. infrequens* increased at day 36 by 56- to 188-fold  
 32 when minor amendments of acetate, propionate, lactate, or butyrate were provided with  
 33 sulfate, as compared to the no-substrate-control. Overall transcriptional activity was driven by  
 34 expression of genes encoding ribosomal proteins, energy metabolism and stress response but  
 35 not by expression of genes encoding cell growth-associated processes. Since our results ruled  
 36 out growth of these highly active microorganisms, they had to invest their sole energy for  
 37 maintenance, most likely counterbalancing acidic pH conditions. This finding explains how a  
 38 rare biosphere member can contribute to a biogeochemically relevant process while remaining  
 39 in a zero growth state.

## 40 **Importance**

41 The microbial rare biosphere represents the largest pool of biodiversity on Earth and  
 42 constitutes, in sum of all its members, a considerable part of a habitat's biomass. Dormancy or  
 43 starvation are typically used to explain the persistence of low-abundance microorganisms in  
 44 the environment. We show that a low-abundance microorganism can be highly transcriptionally  
 45 active while remaining in a zero growth-state over prolonged time periods. Our results provide  
 46 evidence that this zero-growth at high-activity state is driven by maintenance requirements.  
 47 We show that this is true for a microbial keystone species, in particular a cosmopolitan but  
 48 permanently low-abundance sulfate reducer in wetlands that is involved in counterbalancing  
 49 greenhouse gas emission. In summary, our results provide an important step forward in  
 50 understanding rare biosphere members relevant for ecosystem functions.

# 51 Introduction

52 The vast majority of microbial diversity worldwide is represented by the rare biosphere (1–4).  
 53 This entity of microorganisms consists of all microbial species that have an arbitrarily defined  
 54 relative population size of  $<0.1\%$  in a given habitat at a given time (1–4). The rare biosphere is  
 55 opposed by a much smaller number of moderately abundant or very abundant microbial  
 56 species ( $\geq 0.1\%$  and  $\geq 1.0\%$  relative abundance, respectively) (5), which are thought to be  
 57 responsible for the major carbon and energy flow through a habitat as based on their  
 58 cumulative biomass. However, there is accumulating experimental evidence that the rare  
 59 biosphere is not just a “seed bank” of microorganisms that are waiting to become active and  
 60 numerically dominant upon environmental change (3, 6), but also harbors metabolically active  
 61 microorganisms with important ecosystem functions (4).

62 First hints for metabolically active rare biosphere members were evident from seasonal  
 63 patterns of marine bacterioplankton species. Here, many taxa that displayed recurring annual  
 64 abundance changes were of low abundance and even during their bloom periods never  
 65 reached numerically abundant population sizes (7–9). In soil environments, removal of low-  
 66 abundance species by dilution-to-extinction had a positive effect on intruding species,  
 67 suggesting that active low-abundance species pre-occupy ecological niches and thus slow  
 68 down invasion (10–12). Soil microorganisms of low relative abundance were also shown to play  
 69 a role in community-wide species interactions, e.g. by being involved in the production of  
 70 antifungal compounds that protect plants from pathogens (13) or by constituting the core of  
 71 microorganisms that respond to the presence of a particular plant species (14). Other  
 72 examples include microorganisms with a specialized metabolism that sustain stable low-  
 73 abundance populations in an ecosystem (3). For example,  $N_2$ -fixing microorganisms in the  
 74 ocean (15) or sulfate-reducing microorganisms (SRM) in peatlands (5, 16, 17) were shown to  
 75 fulfill such gatekeeper functions.

76 A peatland *Desulfosporosinus* species was one of the first examples identified as an active rare  
 77 biosphere member contributing to an important ecosystem function (16). This SRM is involved  
 78 in the cryptic sulfur cycle of peatlands (5, 16), which in turn controls the emission of the  
 79 greenhouse gas  $CH_4$  from these globally relevant environments (17). Although porewater  
 80 sulfate concentrations are typically quite low in peatlands ( $<300\ \mu M$ ) (17), these environments

81 are characterized by temporally fluctuating high sulfate reduction rates (up to  $1800 \text{ nmol cm}^{-3}$   
 82  $\text{day}^{-1}$ ) (17). These rates can be in the same range as in sulfate-rich marine surface sediments,  
 83 where sulfate reduction is one of the major anaerobic carbon degradation pathways (18, 19). In  
 84 low-sulfate peatlands, such high sulfate reduction rates can only be maintained by rapid  
 85 aerobic or anaerobic re-oxidation of reduced sulfur species back to sulfate (17). Since SRM  
 86 generally outcompete methanogens and syntrophically associated fermenters (20), they exert  
 87 an important intrinsic control function on peatland  $\text{CH}_4$  production (21–23). This is important,  
 88 since natural wetlands, such as peatlands, are estimated to be responsible for 30% of the  
 89 annual emission of this potent greenhouse gas (24–26).

90 Little is known about the ecophysiology of metabolically active but low-abundance  
 91 microorganisms. This lack of knowledge is clearly founded in their low numerical abundance  
 92 making it inherently difficult to study their metabolic responses or even to retrieve their  
 93 genomes directly from the environment. In a preceding study, we could show that the low-  
 94 abundance peatland *Desulfosporosinus* species mentioned above follows an ecological strategy  
 95 to increase its cellular ribosome content while maintaining a stable low-abundance population  
 96 size when exposed to favorable, sulfate-reducing conditions (5). This was unexpected since  
 97 metabolic activity in bacteria and archaea is typically followed by growth (in terms of cell  
 98 division or biomass increase) if they are not severely energy or nutrient limited (27) or engaged  
 99 in major maintenance processes coping with (environmental) stress (28). The studied  
 100 *Desulfosporosinus* species is found worldwide in a wide range of low-sulfate wetlands including  
 101 peatlands, permafrost soils, and rice paddy fields (5). This emphasizes its importance as a  
 102 model organism for active rare biosphere members. In this study, we used an environmental  
 103 systems biology approach to deepen our understanding of the ecophysiology of this rare  
 104 biosphere member. In particular, we retrieved its genome by metagenomics from native and  
 105 incubated peat soil and followed its transcriptional responses in peat soil microcosms, which  
 106 were exposed to different environmental triggers that mimicked diverse *in situ* conditions.

# 107 **Materials and Methods**

## 108 **Genome assembly, binning, and phylogenetic inference**

109 Sampling of peat soil from the acidic peatland Schlöppnerbrunnen II (Germany), DNA-stable  
110 isotope probing (DNA-SIP), total nucleic acids extraction, metagenome sequencing and  
111 assembly, and coverage-based binning was described previously (5, 16, 29). In brief, DNA from  
112 native peat soil (10–20 cm depth) and DNA pooled from 16 <sup>13</sup>C-enriched fractions (density  
113 1.715–1.726 g mL<sup>-1</sup>) of a previous DNA-SIP experiment with soil from the same site (16) was  
114 sequenced using the Illumina HiSeq 2000 system. DNA-SIP was performed after a 73-day  
115 incubation (again 10–20 cm depth) that was periodically amended with small dosages of  
116 sulfate and first a mixture of unlabeled formate, acetate, propionate, and lactate for two weeks  
117 and thereafter a mixture of <sup>13</sup>C-labeled formate, acetate, propionate, and lactate (all in the  
118 lower μM-range) (16). Raw reads were quality filtered, trimmed, and co-assembled (native soil:  
119 385 million reads; DNA-SIP: 576 million reads) using the CLC Genomics Workbench 5.5.1 (CLC  
120 Bio). Differential coverage binning was applied to extract the *Desulfosporosinus* metagenome-  
121 assembled genome (MAG) (30). As expected (16), the *Desulfosporosinus* MAG was of low  
122 abundance in the native soil with an average coverage of 0.026 while enriched in the SIP  
123 sample with an average coverage of 34 (detailed per scaffold in Table S2). A side effect of  
124 sequencing a DNA-SIP sample is an apparent G+C content skew, which was normalized  
125 arbitrarily to improve binning using the following formula (29, 31):

$$126 \quad \frac{\text{Coverage}}{\text{G+C content}^9} \times 10^{15}$$

127 Scaffolds encoding the 16S and 23S rRNA genes were successfully identified using paired-end  
128 linkage data (30). Completeness, contamination, and strain heterogeneity was estimated using  
129 CheckM 1.0.6 (32).

130 Phylogenomic analysis of the *Desulfosporosinus* MAG was based on a concatenated set of 34  
131 phylogenetically informative marker genes as defined by (32) and the Bayesian phylogeny  
132 inference method PhyloBayes using the CAT-GTR model (33). 16S rRNA gene-based phylogeny  
133 was inferred using the ARB SILVA database r126 as a reference (34), the SINA aligner (35), and  
134 the substitution model testing and maximum likelihood treeing method IQ-TREE (36). Pairwise  
135 16S rRNA gene sequence identities were calculated with T-Coffee 11 (37). Pairwise average

136 nucleic and amino acid identities (ANI, AAI) (38) between protein-coding genes of the  
137 *Desulfosporosinus* MAG and reference genomes were calculated as described previously (29)

## 138 **Genome annotation**

139 The genome was annotated using the MicroScope annotation platform (39). Annotation  
140 refinement for selected genes was done as follows: proteins with an amino acid identity  $\geq 40\%$   
141 (over  $\geq 80\%$  of the sequence) to a Swiss-Prot entry (40), curated MaGe annotation (39), or  
142 protein described in the literature were annotated as true homologs of known proteins. The  
143 same was true, if classification according to InterPro families (41, 42), TIGRFAMs (43), and/or  
144 FIGfams (44) led to an unambiguous annotation. Proteins with an amino acid identity  $\geq 25\%$   
145 (over  $\geq 80\%$  of the sequence) to a Swiss-Prot or TrEMBL (40) entry were annotated as putative  
146 homologs of the respective database entries. In addition, classification according to COG (45)  
147 or InterPro superfamilies, domains, or binding sites were used to call putative homologs in  
148 cases of an unambiguous annotation. Membership to syntenic regions (operons) was  
149 considered as additional support to call true or putative homologs.

## 150 **Metatranscriptomics and quantitative PCR from single-substrate incubations**

151 For this study, we re-analysed qPCR and metatranscriptomic data sets of of anoxic peat soil  
152 slurry microcosms that were described previously under different aspects (5, 29). In brief,  
153 anoxic microcosms were incubated at 14 °C in the dark for 50 days and regularly amended  
154 with either low amounts of sulfate (76–387  $\mu\text{M}$  final concentrations) or incubated without an  
155 external electron acceptor. Formate, acetate, propionate, lactate, butyrate ( $< 200 \mu\text{M}$ ), or no  
156 external electron donor was added to biological triplicates each. DNA and/or RNA were  
157 extracted from the native soil and after 5, 8, 15, 26, 36, and 50 days of incubations.  
158 Quantitative PCR data describing 16S rRNA gene copies of the complete *Desulfosporosinus*  
159 population in comparison to the overall bacterial and archaeal community (5) was re-analyzed  
160 to put the metatranscriptome data into the perspective of population dynamics. PCR conditions  
161 are given in (5). Metatranscriptome sequencing was done from each of the biological replicates  
162 using the Illumina HiSeq 2000/2500 platform (27–188 million reads per sample). Raw reads  
163 were quality-filtered as described previously (29) and mapped to the *Desulfosporosinus* MAG in  
164 a background of all other metagenome-assembled scaffolds using Bowtie 2 at default settings  
165 (46). Counting of mapped reads to protein-coding genes (CDS) was performed with

166 featureCounts 1.5.0 (47).

## 167 **Statistical analysis of *Desulfosporosinus*-specific transcripts**

168 Counts of mapped transcript reads were normalized to the length of the respective gene and  
 169 the sequencing depth of the respective metatranscriptome, resulting in FPKM (fragments per  
 170 kilobase per million total fragments) values. Thereafter, we used an unsupervised approach to  
 171 identify CDS expression stimulated by sulfate and the different substrates regimes. First, we  
 172 applied the DESeq2 R package (48, 49) to identify differentially expressed CDS. Treatments  
 173 without external sulfate added and samples after 8 days of incubations had too little transcript  
 174 counts to be used for a statistical approach. Therefore, we limited our analysis to pairwise  
 175 comparison of sulfate-stimulated microcosms after 36 days of incubations. We compared each  
 176 substrate regime to the no-substrate controls and each other. The set of all significantly  
 177 differentially expressed CDS (FDR-adjusted  $p$ -value  $< 0.05$ ) were further clustered into  
 178 response groups. For clustering, we calculated pairwise Pearson's correlation coefficients ( $r$ ) of  
 179 variance stabilized counts (cor function in R), transformed this into distances ( $1-r$ ), followed by  
 180 hierarchical clustering (hclust function in R). Variance stabilisation was performed using the  
 181 rlog function of the DESeq2 package. Spearman's rank correlation of FPKM values for each  
 182 gene to the total relative mRNA counts was performed with cor.test in R using the data from all  
 183 treatments and replicates.

## 184 **Sequence data availability**

185 The MAG SbF1 is available at MicroScope (<https://www.genoscope.cns.fr/agc/microscope/>) and  
 186 is also deposited under the GenBank accession number OMOF01000000. Metagenome and -  
 187 transcriptomic data is available at the Joint Genome Institute (<https://genome.jgi.doe.gov/>) and  
 188 are also deposited under the GenBank accession numbers PRJNA412436 and PRJNA412438,  
 189 respectively.



# Results

## A near complete genome of a rare biosphere member from peat soil

We obtained the population genome of the low-abundance *Desulfosporosinus* species by co-assembly and differential coverage binning of metagenomes obtained from native peat soil and <sup>13</sup>C-labelled fractions of a DNA-stable isotope probing experiment of the same peatland (Fig. S1) (29). The high quality metagenome-assembled genome (MAG) SbF1 had a size of 5.3 Mbp (on 971 scaffolds), a G+C content of 42.6%, a checkM-estimated completeness of 98.0%, a potential residual contamination of 3.9%, and 10% strain heterogeneity. Besides 16S and 23S rRNA genes, SbF1 carried 6440 protein-coding genes (CDS), five 5S rRNA gene copies, 59 tRNAs, and 37 other ncRNAs, making a total of 6543 predicted genomic features. The genome size and G+C content was in the same range as observed for genomes of cultured *Desulfosporosinus* species (3.0–5.9 Mbp and 42–44%, respectively) (50–54). Scaffolds encoding rRNA genes had a higher coverage compared to the average coverage of all scaffolds (Fig. S1), indicating multiple *rrn* operon copies, as is known from genomes of other *Desulfosporosinus* species (on average 9.3 *rrn* operons, range: 8–11) (55).

16S rRNA-based phylogenetic tree reconstruction placed SbF1 into a well supported clade together with *Desulfosporosinus* sp. 44a-T3a (98.3% sequence identity), *Desulfosporosinus* sp. OT (98.8%), and *Desulfosporosinus* sp. 5apy (98.1%). The most similar validly described species was *Desulfosporosinus lacus* with a sequence identity of 97.5% (Fig. S2a). Phylogenomics confirmed *Desulfosporosinus* sp. OT as the closest relative (Fig. S2b) with average amino and nucleic acid identities (AAI and ANI) of 77% and 79%, respectively (Fig. S3). The intra-genus AAI variability of *Desulfosporosinus* species was 69–93% (Fig. S3). Therefore, MAG SbF1 represents a novel species in this genus based on species-level thresholds of 99% for the 16S rRNA gene (56) and 96.5% for ANI (38).

## The versatile energy metabolism of the low-abundance *Desulfosporosinus*

*Desulfosporosinus* sp. MAG SbF1 encoded the complete canonical pathway for dissimilatory sulfate reduction (Fig. 1, Table S1). This encompassed the sulfate adenylyltransferase (Sat), adenylyl-sulfate reductase (AprBA), dissimilatory sulfite reductase (DsrAB), and the sulfide-

218 releasing DsrC, which are sequentially involved in the reduction of sulfate to sulfide. In  
219 addition, genes encoding the electron-transferring QmoAB and DsrMKJOP complexes were  
220 detected, with their subunit composition being typical for *Desulfosporosinus* species (50, 51,  
221 53, 54). Other *dsr* genes included *dsrD*, *dsrN*, and *dsrT* (57) with hitherto unvalidated function,  
222 *fdxD*, which encodes a [4Fe4S]-ferredoxin, and a second set of DsrMK-family encoding genes  
223 (*dsrM2* and *dsrK2*). SbF1 also encoded the trimeric dissimilatory sulfite reductase AsrABC  
224 (anaerobic sulfite reductase) (58).

225 SbF1 carried genes for both complete and incomplete oxidation of propionate and lactate. In  
226 addition, the ability to utilize acetate, formate, or H<sub>2</sub> as electron donors was encoded (Fig. 1).  
227 All enzymes necessary for propionate oxidation to the central metabolite pyruvate (including  
228 those belonging to a partial citric acid cycle) were encoded on two scaffolds (Table S1). For  
229 lactate utilization, SbF1 carried three paralogs of glycolate/D-lactate/L-lactate dehydrogenase  
230 family genes. However, the substrate specificity of the encoded enzymes could not be inferred  
231 from sequence information alone. The transcription of *lutDF* and *lutD\_2* was stimulated by the  
232 addition of L-lactate (Fig. 1), which indicates that these genes encode functional lactate  
233 dehydrogenases (LDH). The third paralog (*glcDF*, Table S1) was not stimulated by lactate.  
234 *LutDF* was organised in an operon with a lactate permease (*LutP*) and a lactate regulatory gene  
235 (*lutR*). *LutD\_2* was organised in a operon with an electron-transferring flavoprotein (*EtfBA\_2*),  
236 which resembled the electron-confurcating LDH/Etf complex in *Acetobacterium woodii* (59).  
237 LDHs have been shown to utilize both L- and D-lactate (59, 60). However, SbF1 also encoded a  
238 lactate racemase (*LarA*) and a lactate racemase-activating system (*LarEBC*) for interconversion  
239 of both stereoisomers (61).

240 Pyruvate, the intermediate product in propionate and lactate degradation, can be further  
241 oxidized to acetyl-CoA with either one of several pyruvate-ferredoxin oxidoreductases (*PfoA*) or  
242 formate C-acetyltransferase (*PflD*). Acetyl-CoA can then be completely oxidized to CO<sub>2</sub> via the  
243 Wood-Ljungdahl pathway (62), which is complete in SbF1 (Fig. 1, Table S1) and present in the  
244 genomes of all other sequenced *Desulfosporosinus* species (50, 51, 53, 54). Alternatively,  
245 acetyl-CoA may be incompletely oxidized to acetate via acetyl-phosphate by phosphate  
246 acetyltransferase (*Pta*) and acetate kinase (*AckA*). *Pta* and *AckA* are bidirectional enzymes,  
247 opening the possibility that acetate could be degraded via these two enzymes and the  
248 downstream Wood-Ljungdahl pathway to CO<sub>2</sub>.

249 Formate and H<sub>2</sub> represented additional potential electron donors for SbF1. Its genome encoded  
250 three formate dehydrogenases (FDH). FDH-1 consists of three subunits (*fdhCBA*) while FDH-2  
251 (FdhA<sub>2</sub>) and FDH-3 (FdhA<sub>3</sub>) are monomeric enzymes. In addition, [NiFe] hydrogenases of  
252 group 1 and 4f, as well as [FeFe] hydrogenases of group A (63) were encoded. Homologs of  
253 genes for butyrate oxidation were missing in SbF1 (64), which is in contrast to other  
254 *Desulfosporosinus* species (e.g., *Desulfosporosinus orientis*). Both glycolysis and  
255 gluconeogenesis were complete. However, neither a glucokinase or a phosphotransferase  
256 system was found (PTS). Coupling of electron transfer to energy conservation could be  
257 mediated in SbF1 by a H<sup>+</sup>/Na<sup>+</sup>-pumping Rnf complex (RnfCDGEAB) (65) and a NADH  
258 dehydrogenase (respiratory complex I, NuoABCDEFGHijklmn). In addition, the complete gene  
259 set for ATP synthase (AtpABCDEFGH) was identified (Fig. 1, Table S1).

## 260 **Long-term transcriptional activity of *Desulfosporosinus* sp. MAG SbF1 at zero**

## 261 **growth**

262 Naturally occurring hot spots of sulfate reducing activity in peat soil (66–69) were mimicked by  
263 periodically amending sulfate in the lower μM-range to anoxic peat microcosms (every 3–7  
264 days) and comparing this to unamended (i.e., methanogenic) control microcosms. In addition,  
265 sulfate reducing and methanogenic microcosms received, in triplicates, periodic amendments  
266 of either formate, acetate, propionate, lactate, or butyrate as compared to controls without  
267 amendment. Substrate supply did generally not exceed 100–200 μM thus again mimicking *in*  
268 *situ* concentrations of these naturally occurring organic carbon degradation intermediates in  
269 peatlands (5). The overall *Desulfosporosinus* population remained stable throughout the  
270 incubation period in the various microcosms (on average  $1.2 \times 10^6$  16S rRNA gene copies per  
271 cm<sup>3</sup> of soil, Fig. 2a). Compared to the total bacterial and archaeal community, this resembled a  
272 relative abundance of 0.018% when corrected for the average 9.3 *rrn* operons per genome in  
273 the genus *Desulfosporosinus* (55). The 16S rRNA gene of *Desulfosporosinus* sp. MAG SbF1 was  
274 100% identical to OTU0051, which dominated the *Desulfosporosinus* population as evident  
275 from a previously published 16S rRNA (gene) amplicon survey of the same microcosms (5). In  
276 contrast to its stable low-abundance, the overall *Desulfosporosinus* population substantially  
277 increased its 16S rRNA copy numbers by 2.2, 4.9, 5.9, or 13.6-fold in sulfate reducing  
278 incubations stimulated by either acetate, propionate, lactate, or butyrate, respectively. In

279 contrast, *Desulfosporosinus* 16S rRNA copy numbers remained stable or even slightly  
280 decreased in the sulfate-amended no-substrate-control and the methanogenic incubations (Fig.  
281 S4). Again, these increases were mainly reflected in changes of OTU0051 (*Desulfosporosinus*  
282 sp. MAG SbF1) as shown in the amplicon study mentioned above (5).

283 We used metatranscriptomics of the same microcosms to analyse whether this strong increase  
284 in 16S rRNA copies at zero growth was accompanied by gene expression of metabolic  
285 pathways and cell-growth associated processes in *Desulfosporosinus* sp. MAG SbF1. Compared  
286 to the initial soil, the overall transcriptional activity of SbF1 steadily increased at day 8 and 36  
287 in sulfate reducing incubations stimulated by either acetate, propionate, lactate, or butyrate. In  
288 contrast, all methanogenic incubations as well as the sulfate reducing formate and no-  
289 substrate incubations showed after an initial stimulation until day 8, a steady or even mildly  
290 decreasing overall transcriptional activity (Fig. 2b). At day 36, normalized mRNA counts of SbF1  
291 were 56-, 80-, 62-, or 188-fold higher in sulfate reducing incubations stimulated by either  
292 acetate, propionate, lactate, or butyrate, respectively, as compared to the no-substrate-control  
293 and constituted between  $0.11 \pm 0.13\%$  (acetate) and  $0.36 \pm 0.02\%$  (butyrate) of all transcripts  
294 in the corresponding metatranscriptomes (Fig. 2b). This substrate-specific activity was driven  
295 by the increased transcription of genes encoding ribosomal proteins as general activity  
296 markers (Fig. 3, Table S1) and energy metabolism genes including all canonical dissimilatory  
297 sulfate reduction genes (Fig. 4, Table S1). For example, Spearman's rank correlation  
298 coefficients of normalised *dsrA* and *dsrB* transcript counts as compared to the sum of  
299 normalised SFb1 mRNA counts were 0.91 and 0.90, respectively (FDR-adjusted  $p$ -value <  
300 0.001). Normalised transcript counts of other enzyme complexes involved in the central  
301 metabolism of SbF1 such as the ATP synthase, the NADH dehydrogenase (complex I), and  
302 ribosomal proteins followed the same transcriptional pattern (Fig. 4, Table S1) with an average  
303 Spearman's rank correlation coefficients of  $0.79 \pm 0.07$  ( $n = 72$ , FDR-adjusted  $p$ -value < 0.05)  
304 to the sum of normalised SFb1 mRNA counts. Interestingly, transcription of genes encoding  
305 proteins involved in general stress response were stimulated as well. In particular, genes  
306 encoding the universal stress promotor *UspA*, the GroES/GroEL and DnaK chaperons, and the  
307 proteolytic subunit of ATP-dependent Clp protease (ClpP) showed an increased transcription  
308 (Fig. 4) with an average Spearman's rank correlation coefficients of  $0.76 \pm 0.04$  ( $n = 5$ , FDR-  
309 adjusted  $p$ -value < 0.05) to the sum of normalised SFb1 mRNA counts.

310 To evaluate whether a hidden turnover of biomass (cryptic growth) was underlying the stable  
 311 *Desulfosporosinus* population, we screened COG categories D, L, and M for expression of  
 312 indicator genes that encode functions in cell division (e.g., *ftsZ* or *minE*), DNA replication (e.g.,  
 313 *gyrBA*, *dnaC*, and *dnaG*), and cell envelope biogenesis (e.g., *murABCDEFGI*), respectively.  
 314 Genes that unambiguously encoded such functions (Table S1) showed only very minor or no  
 315 increases in transcripts over time (Fig. 3, detailed in Fig. S5). Extension of this analysis to all  
 316 genes belonging to COG D (n = 73), L (n = 280), and M (n = 215) showed that the average  
 317 Spearman's rank correlation coefficients to the sum of normalised mRNA counts was only 0.45  
 318  $\pm$  0.13 (FDR-adjusted *p*-value < 0.05, Table S1).

319 We also analysed genes reported to be upregulated immediately after phage infection, which is  
 320 an important ecological control of bacterial population size. Respective genes in *Bacillus*  
 321 *subtilis* encode, e.g., functions in DNA and protein metabolism and include the ribonucleoside-  
 322 diphosphate reductase (*nrdEF*) and aspartyl/glutamyl-tRNA amidotransferase (*gatCAB*) (70).  
 323 However, homologs in SbF1 did not show increased expression in the incubations with  
 324 increased total transcriptional activity (Table S1). This was reflected in an average Spearman's  
 325 rank correlation coefficient of only 0.60  $\pm$  0.06 (n = 4, FDR-adjusted *p*-value < 0.05) to the sum  
 326 of normalised SFb1 mRNA counts. The same was true when screening for active sporulation of  
 327 a *Desulfosporosinus* subpopulation as an alternative explanation for a stable low-abundance  
 328 population. The identified sporulation genes (*spo0A-spoVT*) did not show any prominent  
 329 increase in transcript numbers as well, with the only exception of *spolIAD*, which was  
 330 stimulated in propionate- and sulfate-amended microcosms (Table S1). Again, expression of  
 331 genes involved in sporulation had a low average Spearman's rank correlation coefficient of  
 332 0.44  $\pm$  0.13 (n = 22, FDR-adjusted *p*-value < 0.05) to the sum of normalised SFb1 mRNA  
 333 counts.

334 The individual incubation regimes triggered in addition transcriptional activation of the  
 335 respective substrate degradation pathways of *Desulfosporosinus* sp. MAG SbF1. For example,  
 336 all genes necessary for the conversion of propionate to pyruvate were overexpressed only  
 337 upon addition of propionate and sulfate but not in any other incubation type. The same was  
 338 true for lactate degradation, where genes encoding the lactate permease, lactate racemase  
 339 and two of the detected lactate dehydrogenases were overexpressed upon addition of both  
 340 lactate and sulfate, but not in incubations with lactate only (Fig. 4). Although genes encoding

341 phosphotransacetylase and acetate kinase were overexpressed under lactate and propionate,  
 342 the complete Wood-Ljungdahl pathway was overexpressed as well, which indicates that at  
 343 least part of these substrates were completely degraded to CO<sub>2</sub> rather than to acetate and CO<sub>2</sub>.  
 344 This conclusion was supported by the overexpression of the Wood-Ljungdahl pathway in  
 345 incubations amended with acetate and sulfate. Interestingly, the Wood-Ljungdahl pathway was  
 346 also overexpressed upon addition of butyrate and sulfate. Under such conditions,  
 347 *Desulfosporosinus* sp. MAG SbF1 apparently relies on a syntrophic lifestyle based on acetate  
 348 uptake as it lacked the capability for butyrate oxidation; albeit failed recovery of the butyrate  
 349 degradation pathway during binning cannot be excluded.

## 350 Discussion

351 Current knowledge on the interconnection of energy metabolism, gene expression, cell  
 352 division, and population growth in microorganisms is mainly based on pure cultures that are  
 353 maintained in the laboratory. Under ideal conditions, a single *Escherichia coli* cell would grow  
 354 to a population with the mass of the Earth within 2 days. Clearly, this does not occur but the  
 355 discrepancy between potential and actual growth underscores that microorganisms spend the  
 356 vast majority of their time not dividing (27, 71). A large fraction of these microorganisms is part  
 357 of the rare biosphere. For example, in the studied peatland, the sum of all low-abundance  
 358 species made up approximately 12% of the total bacterial and archaeal 16S rRNA genes (5). In  
 359 other soils, low-abundance *Alphaproteobacteria* and *Bacteroidetes* alone constituted in sum  
 360 10% and 9% of the total bacterial population, respectively, while all low-abundance populations  
 361 summed up to 37% of all bacteria (14). Upon strong environmental change, low-abundance  
 362 microorganisms often grow to numerically abundant populations and replace dominant species  
 363 as observed for microbial community changes after an oil spill (72, 73) or in the response of  
 364 soil microorganisms towards the presence of plants (14). However, subtle environmental  
 365 changes (5) or recurring seasonal shifts (7, 9, 74) often lead to rather small shifts in low-  
 366 abundance populations without rare biosphere members becoming numerically dominant.

367 The low-abundance *Desulfosporosinus* sp. MAG SbF1 represents an interesting case of the  
 368 latter response type. When exposed to favorable, sulfate-reducing conditions in peat soil  
 369 microcosms, the overall *Desulfosporosinus* population did not increase its population size of  
 370 about  $1.2 \times 10^6$  16S rRNA gene copies  $\text{cm}^{-3}$  soil (Fig. 2a) but strongly increased its cellular  
 371 ribosome content by up to one order of magnitude (Fig. S4) (5). In a preceding 16S rRNA (gene)  
 372 amplicon study which analysed the same microcosms, we could show that *Desulfosporosinus*  
 373 OTU0051 is the major constituent of this *Desulfosporosinus* population and correlated best in  
 374 its 16S rRNA response to sulfate turnover among all identified SRM (5). Here, we re-analyzed  
 375 these microcosms to expand upon this observation by genome-centric metatranscriptomics  
 376 and to test whether the increase in cellular ribosome content is indeed translated into  
 377 transcriptional and, as a consequence, metabolic activity. *Desulfosporosinus* OTU0051 was  
 378 100% identical to the 16S rRNA gene of *Desulfosporosinus* sp. MAG SbF1, which was retrieved  
 379 in this study and as such represented the major *Desulfosporosinus* population. In support of  
 380 this conclusion, increases in 16S rRNA copies of the overall *Desulfosporosinus* population (Fig.



381 S4) clearly corresponded to increased transcription of genes coding for ribosomal proteins in  
 382 *Desulfosporosinus* sp. MAG SbF1 (Fig. 3, Table S1) (5). This cellular ribosome increase under  
 383 sulfate-reducing conditions correlated well to an increase in all normalised mRNA counts (Fig.  
 384 2b). This is the first time that changes in population-wide 16S rRNA levels are proven to be  
 385 directly linked to transcriptional activity for a rare biosphere member.

386 Analyzing the transcriptional response of a rare biosphere member under *in situ*-like conditions  
 387 opens the unique opportunity to gain insights into its ecophysiology. *Desulfosporosinus* sp.  
 388 MAG SbF1 clearly overexpressed its sulfate reduction pathway under sulfate amendment when  
 389 supplied with either acetate, lactate, propionate, or butyrate as compared to the no-substrate  
 390 and the methanogenic controls (Fig. 4). Detailed analysis of the transcribed carbon degradation  
 391 pathways showed that *Desulfosporosinus* sp. MAG SbF1 is able to oxidise propionate, lactate,  
 392 and acetate completely to CO<sub>2</sub>. Under butyrate-amended conditions, it presumably relied on  
 393 syntrophic oxidation of acetate supplied by a primary butyrate oxidiser. This shows that  
 394 *Desulfosporosinus* sp. MAG SbF1 is capable of utilising diverse substrates that represent the  
 395 most important carbon degradation intermediates measured in peatlands (75, 76). Such a  
 396 generalist lifestyle is of clear advantage in peat soil given the highly variable nutrient and  
 397 redox conditions (75, 76). These fluctuations are caused by the periodically changing water  
 398 table that steadily shifts the oxic-anoxic interface (67, 77). In addition, the complex flow paths  
 399 of water create distinct spatial and temporal patterns (hot spots and hot moments) of various  
 400 biogeochemical parameters including sulfate and substrate availability, to which peat  
 401 microorganisms have to adapt (66-69).

402 The question remains, which mechanisms are at work that keep the transcriptionally active  
 403 *Desulfosporosinus* sp. MAG SbF1 population in a stable low-abundance state? Ongoing growth  
 404 could be hidden by continuous predation, viral lysis, or active sporulation of a major  
 405 subpopulation. To answer this question, we analysed expression patterns of genes involved in  
 406 cell growth-associated processes. Compared to the strong overexpression of metabolic or  
 407 ribosomal protein genes, transcription of genes essential for DNA replication, cell division, and  
 408 cell envelope biogenesis did not increase or only marginally (Fig. 3, Fig. S5). In contrast,  
 409 retentostat studies on cultured *Firmicutes* held in a (near)-zero growth state revealed that  
 410 expression of genes involved in cell growth, central energy metabolism, and the translational  
 411 apparatus were always co-regulated, either showing a joint increased expression in *Bacillus*



412 *subtilis* (78) or an invariable expression in *Lactobacillus plantarum* (79) when comparing active  
413 growth to (near)-zero growth. In addition, there is experimental evidence that in the lag phase  
414 of batch cultures, i.e., in the transition from no growth to growth, transcription of growth-  
415 related genes is not stable but increases due to the overall activation of cellular processes (80).  
416 In this context, the lack of an increasing transcription of growth-related genes would clearly  
417 indicate a state of (near-)zero growth rather than an actively dividing population that is kept  
418 stable by an equally high growth and mortality or sporulation rate. This conclusion is further  
419 supported by the lack of overexpressed sporulation genes or genes upregulated directly after  
420 phage attack (Table S1; Table S3).

421 Nevertheless, the ATP generated by the induced energy metabolism has to be consumed. If not  
422 used for growth, it has to be invested completely for maintenance according to the Herbert-Pirt  
423 relation  $q_s = m_s + \mu/Y_{sx}^{\max}$ , where  $q_s$  is the biomass-specific consumption rate,  $m_s$  is the  
424 maintenance coefficient,  $\mu$  is the specific growth rate, and  $Y_{sx}^{\max}$  is the the maximum growth  
425 yield (81, 82). Based on the the concept of a species-independent maintenance energy  
426 requirement as laid out by (83), and further developed by (28), it can be calculated that  
427 *Desulfosporosinus* sp. MAG SbF1 would need to consume 2.1 fmol sulfate per day to maintain a  
428 single cell in our incubations when, e.g., incompletely oxidizing lactate to acetate (detailed in  
429 Supplementary Information). This is in agreement with experimentally determined  
430 maintenance requirements of *Desulfotomaculum putei* (84), but two orders of magnitude  
431 smaller than the cell-specific sulfate reduction rates of *Desulfosporosinus* sp. MAG SbF1  
432 estimated previously in a similar experimental setup of the same peat soil by (16) (here the  
433 responsive but low-abundance *Desulfosporosinus* OTU was 99.8% identical to the 16S rRNA  
434 gene of *Desulfosporosinus* sp. MAG SbF1). However, maintenance requirements are known to  
435 increase upon production of storage compounds or to counterbalance environmental stress  
436 (28). We found no indication for the former scenario but observed overexpression of the  
437 universal stress promotor UspA, which is one of the most abundant proteins in growth-arrested  
438 cells (85). In addition, we observed overexpression of the chaperons GroES/GroEL and DnaK  
439 and of the protease ClpP, which were all previously linked to low pH stress response at the  
440 expense of ATP consumption (86–90). Since the pH in the analyzed peat soil incubations varied  
441 between 4.1–5.0 (5), coping with a low pH would be the most parsimonious explanation for  
442 increased maintenance requirements. In this context, one may speculate whether the

443 overexpressed ATP synthase might have operated as an ATPase to pump protons out of the cell  
 444 at the expense of ATP hydrolysis, which is a known response mechanisms towards mildly acidic  
 445 pH (90). Similar, the overexpressed sulfate reduction pathway including complex I and the  
 446 membrane quinone shuttle might have been co-utilized as proton pump without harvesting the  
 447 membrane potential for ATP generation. Since active sulfate reduction would also consume  
 448 protons in the vicinity of *Desulfosporosinus* sp. MAG SbF1 and thus slowly increase its  
 449 surrounding pH, a high metabolic activity at concomitant zero growth controlled by  
 450 maintenance requirements would make sense.

451 Our results are important in the context of the increasing awareness that the microbial rare  
 452 biosphere is not only the largest pool of biodiversity on Earth (1–4) but in sum of all its low-  
 453 abundance members constitutes also a large part of the biomass in a given habitat (5, 14).  
 454 Understanding the mechanisms governing this low-abundance prevalence and its direct impact  
 455 on ecosystem functions and biogeochemical cycling is thus of utmost importance.  
 456 *Desulfosporosinus* sp. MAG SbF1 has been repeatedly shown to be involved in cryptic sulfur  
 457 cycling in peatlands (5, 16) — a process that counterbalances the emission of the greenhouse  
 458 gas methane due to the competitive advantage of SRM as compared to microorganisms  
 459 involved in the methanogenic degradation pathways (20). This species can be found worldwide  
 460 in low-sulfate environments impacted by cryptic sulfur cycling including not only peatlands but  
 461 also permafrost soils, rice paddies, and other wetland types (5). Here, we provided proof that  
 462 *Desulfosporosinus* sp. MAG SbF1 is indeed involved in the degradation of important anaerobic  
 463 carbon degradation intermediates in peatlands while sustaining a low-abundance population. It  
 464 has a generalist lifestyle in respect to the usable carbon sources, re-emphasizing its  
 465 importance in the carbon and sulfur cycle of peatlands. Our results provide an important step  
 466 forward in understanding the microbial ecology of biogeochemically relevant microorganisms  
 467 and show that low-abundance keystone species can be studied “in the wild” using modern  
 468 environmental systems biology approaches.

## 469 **Proposal of *Candidatus Desulfosporosinus infrequens***

470 Based on its phylogenetic placement and novel ecophysiological behaviour, we propose that  
 471 *Desulfosporosinus* sp. MAG SbF1 represents a novel species with the provisional name  
 472 *Candidatus Desulfosporosinus infrequens* sp. nov. (in.fre'quens. L. adj. *infrequens*, rare,  
 473 referring to its low relative abundance). Based on its genome-derived metabolic potential and  
 474 support from metatranscriptomics, *Ca. D. infrequens* is capable of complete oxidation of  
 475 acetate, propionate and lactate with sulfate as the electron acceptor, with further potential for  
 476 oxidation of molecular hydrogen (Fig. 1).

## 477 **Acknowledgements**

478 We are grateful to Mads Albertsen, Norbert Bittner, Tijana Glavina del Rio, Florian Goldenberg,  
 479 Craig Herbold, Stephan Köstlbacher, Per H. Nielsen, Ulrich Stingl, and Susannah G. Tringe for  
 480 sequence analysis and technical support. We further thank Bernhard Schink for help in naming  
 481 *Ca. D. infrequens*, Kenneth Wasmund for valuable feedback, and Johannes Wittmann, Jan-Ulrich  
 482 Kreft, and Silvia Bulgheresi for helpful expert opinions. We acknowledge the LABGeM  
 483 (CEA/IG/Genoscope & CNRS UMR8030) and the France Génomique National infrastructure  
 484 (funded as part of Investissement d'avenir program managed by Agence Nationale pour la  
 485 Recherche, contract ANR-10-INBS-09) for support with the MicroScope annotation platform. The  
 486 work conducted by the Joint Genome Institute was supported by the Office of Science of the  
 487 U.S. Department of Energy under Contract No. DE-AC02-05CH11231. This research was  
 488 financially supported by the Austrian Science Fund (FWF, P23117-B17 to MP and AL, P25111-  
 489 B22 to AL), the U.S. Department of Energy (CSP605 to MP and AL), the German Research  
 490 Foundation (DFG, PE 2147/1-1 to MP), and the European Union (FP7-People-2013-CIG, Grant No  
 491 PCIG14-GA-2013-630188 to MP).

## 492 **Conflict of Interest**

493 The authors declare no conflict of interest.

# References

1. Sogin ML, Morrison HG, Huber JA, Mark Welch D, Huse SM, Neal PR, Arrieta JM, Herndl GJ. 2006. Microbial diversity in the deep sea and the underexplored “rare biosphere”. *Proc Natl Acad Sci USA* 103:12115–12120.
2. Pedrós-Alió C. 2012. The rare bacterial biosphere. *Ann Rev Mar Sci* 4:449–466.
3. Lynch MDJ, Neufeld JD. 2015. Ecology and exploration of the rare biosphere. *Nat Rev Microbiol* 13:217–229.
4. Jousset A, Bienhold C, Chatzinotas A, Gallien L, Gobet A, Kurm V, Küsel K, Rillig MC, Rivett DW, Salles JF, Heijden MGA van der, Youssef NH, Zhang X, Wei Z, Hol WHG. 2017. Where less may be more: how the rare biosphere pulls ecosystems strings. *ISME J* 11:853–862.
5. Hausmann B, Knorr K-H, Schreck K, Tringe SG, Glavina del Rio T, Loy A, Pester M. 2016. Consortia of low-abundance bacteria drive sulfate reduction-dependent degradation of fermentation products in peat soil microcosms. *The ISME Journal* 10:2365–2375.
6. Müller AL, de Rezende JR, Hubert CRJ, Kjeldsen KU, Lagkouvardos I, Berry D, Jørgensen BB, Loy A. 2014. Endospores of thermophilic bacteria as tracers of microbial dispersal by ocean currents. *ISME J* 8:1153–1165.
7. Campbell BJ, Yu L, Heidelberg JF, Kirchman DL. 2011. Activity of abundant and rare bacteria in a coastal ocean. *Proc Natl Acad Sci USA* 108:12776–12781.
8. Hugoni M, Taib N, Debroas D, Domaizon I, Jouan Dufournel I, Bronner G, Salter I, Agogué H, Mary I, Galand PE. 2013. Structure of the rare archaeal biosphere and seasonal dynamics of active ecotypes in surface coastal waters. *Proc Natl Acad Sci USA* 110:6004–6009.
9. Alonso-Sáez L, Díaz-Pérez L, Morán XAG. 2015. The hidden seasonality of the rare biosphere in coastal marine bacterioplankton. *Environ Microbiol* 17:3766–3780.
10. van Elsas JD, Chiurazzi M, Mallon CA, Elhottova D, Kristufek V, Salles JF. 2012. Microbial diversity determines the invasion of soil by a bacterial pathogen. *Proc Natl Acad Sci USA* 109:1159–1164.

- 520 11. Vivant A-L, Garmyn D, Maron P-A, Nowak V, Piveteau P. 2013. Microbial diversity and  
521 structure are drivers of the biological barrier effect against *Listeria monocytogenes* in soil. *PLoS*  
522 *One* 8:e76991.
- 523 12. Mallon CA, Poly F, Le Roux X, Marring I, Elsas JD van, Salles JF. 2015. Resource pulses can  
524 alleviate the biodiversity-invasion relationship in soil microbial communities. *Ecology* 96:915-  
525 926.
- 526 13. Hol WHG, Garbeva P, Hordijk C, Hundscheid PJ, Gunnewiek PJA, Van Agtmaal M, Kuramae  
527 EE, De Boer W. 2015. Non-random species loss in bacterial communities reduces antifungal  
528 volatile production. *Ecology* 96:2042–2048.
- 529 14. Dawson W, Hör J, Egert M, Kleunen M van, Pester M. 2017. A small number of low-  
530 abundance bacteria dominate plant species-specific responses during rhizosphere colonization.  
531 *Front Microbiol* 8:975.
- 532 15. Großkopf T, Mohr W, Baustian T, Schunck H, Gill D, Kuypers MMM, Lavik G, Schmitz Ra,  
533 Wallace DWR, LaRoche J. 2012. Doubling of marine dinitrogen-fixation rates based on direct  
534 measurements. *Nature* 488:361–364.
- 535 16. Pester M, Bittner N, Deevong P, Wagner M, Loy A. 2010. A ‘rare biosphere’ microorganism  
536 contributes to sulfate reduction in a peatland. *ISME J* 4:1591–1602.
- 537 17. Pester M, Knorr K-H, Friedrich MW, Wagner M, Loy A. 2012. Sulfate-reducing  
538 microorganisms in wetlands – fameless actors in carbon cycling and climate change. *Front*  
539 *Microbiol* 3:72.
- 540 18. Jørgensen BB. 1982. Mineralization of organic matter in the sea bed—the role of sulphate  
541 reduction. *Nature* 296:643–645.
- 542 19. Bowles MW, Mogollón JM, Kasten S, Zabel M, Hinrichs K-U. 2014. Global rates of marine  
543 sulfate reduction and implications for sub-sea-floor metabolic activities. *Science* 344:889–891.
- 544 20. Muyzer G, Stams AJM. 2008. The ecology and biotechnology of sulphate-reducing bacteria.  
545 *Nat Rev Microbiol* 6:441–454.
- 546 21. Gauci V, Matthews E, Dise N, Walter B, Koch D, Granberg G, Vile M. 2004. Sulfur pollution

547 suppression of the wetland methane source in the 20th and 21st centuries. *Proc Natl Acad Sci*  
548 USA 101:12583–12587.

549 22. Gauci V, Dise N, Blake S. 2005. Long-term suppression of wetland methane flux following a  
550 pulse of simulated acid rain. *Geophys Res Lett* 32:L12804.

551 23. Gauci V, Chapman SJ. 2006. Simultaneous inhibition of CH<sub>4</sub> efflux and stimulation of  
552 sulphate reduction in peat subject to simulated acid rain. *Soil Biol Biochem* 38:3506–3510.

553 24. Ciais P, Sabine C, Bala G, Bopp L, Brovkin V, Canadell J, Chhabra A, DeFries R, Galloway J,  
554 Heimann M, Jones C, Quéré CL, Myneni R, Piao S, Thornton P. 2013. Carbon and Other  
555 Biogeochemical Cycles. *In* Stocker, T, Qin, D, Plattner, G-K, Tignor, M, Allen, S, Boschung, J,  
556 Nauels, A, Xia, Y, Bex, V, Midgley, P (eds.), *Climate Change 2013 The Physical Science Basis*.  
557 Cambridge University Press.

558 25. Kirschke S, Bousquet P, Ciais P, Saunois M, Canadell JG, Dlugokencky EJ, Bergamaschi P,  
559 Bergmann D, Blake DR, Bruhwiler L, Cameron-Smith P, Castaldi S, Chevallier F, Feng L, Fraser  
560 A, Heimann M, Hodson EL, Houweling S, Josse B, Fraser PJ, Krummel PB, Lamarque J-F,  
561 Langenfelds RL, Le Quéré C, Naik V, O'Doherty S, Palmer PI, Pison I, Plummer D, Poulter B,  
562 Prinn RG, Rigby M, Ringeval B, Santini M, Schmidt M, Shindell DT, Simpson IJ, Spahni R, Steele  
563 LP, Strode Sa, Sudo K, Szopa S, Werf GR van der, Voulgarakis A, Weele M van, Weiss RF,  
564 Williams JE, Zeng G. 2013. Three decades of global methane sources and sinks. *Nat Geosci*  
565 6:813–823.

566 26. Saunois M, Bousquet P, Poulter B, Peregon A, Ciais P, Canadell JG, Dlugokencky EJ, Etiope G,  
567 Bastviken D, Houweling S, Janssens-Maenhout G, Tubiello FN, Castaldi S, Jackson RB, Alexe M,  
568 Arora VK, Beerling DJ, Bergamaschi P, Blake DR, Brailsford G, Brovkin V, Bruhwiler L, Crevoisier  
569 C, Crill P, Covey K, Curry C, Frankenberg C, Gedney N, Höglund-Isaksson L, Ishizawa M, Ito A,  
570 Joos F, Kim H-S, Kleinen T, Krummel P, Lamarque J-F, Langenfelds R, Locatelli R, Machida T,  
571 Maksyutov S, McDonald KC, Marshall J, Melton JR, Morino I, Naik V, O'Doherty S,  
572 Parmentier F-JW, Patra PK, Peng C, Peng S, Peters GP, Pison I, Prigent C, Prinn R, Ramonet M,  
573 Riley WJ, Saito M, Santini M, Schroeder R, Simpson IJ, Spahni R, Steele P, Takizawa A, Thornton  
574 BF, Tian H, Tohjima Y, Viovy N, Voulgarakis A, Weele M van, Werf GR van der, Weiss R,  
575 Wiedinmyer C, Wilton DJ, Wiltshire A, Worthy D, Wunch D, Xu X, Yoshida Y, Zhang B, Zhang Z,  
576 Zhu Q. 2016. The global methane budget 2000–2012. *Earth Syst Sci Data* 8:697–751.

577 27. Lever MA, Rogers KL, Lloyd KG, Overmann J, Schink B, Thauer RK, Hoehler TM, Jørgensen  
578 BB. 2015. Life under extreme energy limitation: a synthesis of laboratory- and field-based  
579 investigations. FEMS Microbiol Rev 39:688–728.

580 28. Harder J. 1997. Species-independent maintenance energy and natural population sizes.  
581 FEMS Microbiol Ecol 23:39–44.

582 29. Hausmann B, Pelikan C, Herbold CW, Köstlbacher S, Albertsen M, Eichorst SA, Glavina Del  
583 Rio T, Huemer M, Nielsen PH, Rattei T, Stingl U, Tringe SG, Trojan D, Wentrup C, Woebken D,  
584 Pester M, Loy A. 2018. Peatland *Acidobacteria* with a dissimilatory sulfur metabolism. ISME J.

585 30. Albertsen M, Hugenholtz P, Skarshewski A, Nielsen KL, Tyson GW, Nielsen PH. 2013.  
586 Genome sequences of rare, uncultured bacteria obtained by differential coverage binning of  
587 multiple metagenomes. Nat Biotechnol 31:533–538.

588 31. Herbold CW, Lehtovirta-Morley LE, Jung M-Y, Jehmlich N, Hausmann B, Han P, Loy A, Pester  
589 M, Sayavedra-Soto LA, Rhee S-K, Prosser JL, Nicol GW, Wagner M, Gubry-Rangin C. 2017.  
590 Ammonia-oxidising archaea living at low pH: insights from comparative genomics. Environ  
591 Microbiol 19:4939–4952.

592 32. Parks DH, Imelfort M, Skennerton CT, Hugenholtz P, Tyson GW. 2015. CheckM: assessing  
593 the quality of microbial genomes recovered from isolates, single cells, and metagenomes.  
594 Genome Res 25:1043–1055.

595 33. Lartillot N, Lepage T, Blanquart S. 2009. PhyloBayes 3: a Bayesian software package for  
596 phylogenetic reconstruction and molecular dating. Bioinformatics 25:2286–2288.

597 34. Quast C, Pruesse E, Yilmaz P, Gerken J, Schweer T, Yarza P, Peplies J, Glöckner FO. 2013.  
598 The SILVA ribosomal RNA gene database project: improved data processing and web-based  
599 tools. Nucleic Acids Res 41:D590–D596.

600 35. Pruesse E, Peplies J, Glöckner FO. 2012. SINA: accurate high-throughput multiple sequence  
601 alignment of ribosomal RNA genes. Bioinformatics 28:1823–1829.

602 36. Trifinopoulos J, Nguyen L-T, von Haeseler A, Minh BQ. 2016. W-IQ-TREE: a fast online  
603 phylogenetic tool for maximum likelihood analysis. Nucleic Acids Res 44:W232–W235.



- 604 37. Notredame C, Higgins DG, Heringa J. 2000. T-Coffee: a novel method for fast and accurate  
605 multiple sequence alignment. *J Mol Biol* 302:205–217.
- 606 38. Varghese NJ, Mukherjee S, Ivanova N, Konstantinidis KT, Mavrommatis K, Kyrpides NC, Pati  
607 A. 2015. Microbial species delineation using whole genome sequences. *Nucleic Acids Res*  
608 43:6761–6771.
- 609 39. Vallenet D, Calteau A, Cruveiller S, Gachet M, Lajus A, Josso A, Mercier J, Renaux A, Rollin J,  
610 Rouy Z, Roche D, Scarpelli C, Médigue C. 2017. MicroScope in 2017: an expanding and evolving  
611 integrated resource for community expertise of microbial genomes. *Nucleic Acids Res*  
612 45:D517–D528.
- 613 40. The UniProt Consortium. 2017. UniProt: the universal protein knowledgebase. *Nucleic Acids*  
614 *Res* 45:D158–D169.
- 615 41. Mitchell A, Chang H-Y, Daugherty L, Fraser M, Hunter S, Lopez R, McAnulla C, McMenamin  
616 C, Nuka G, Pesseat S, Sangrador-Vegas A, Scheremetjew M, Rato C, Yong S-Y, Bateman A,  
617 Punta M, Attwood TK, Sigrist CJA, Redaschi N, Rivoire C, Xenarios I, Kahn D, Guyot D, Bork P,  
618 Letunic I, Gough J, Oates M, Haft D, Huang H, Natale DA, Wu CH, Orengo C, Sillitoe I, Mi H,  
619 Thomas PD, Finn RD. 2015. The InterPro protein families database: the classification resource  
620 after 15 years. *Nucleic Acids Res* 43:D213–D221.
- 621 42. Jones P, Binns D, Chang H-Y, Fraser M, Li W, McAnulla C, McWilliam H, Maslen J, Mitchell A,  
622 Nuka G, Pesseat S, Quinn AF, Sangrador-Vegas A, Scheremetjew M, Yong S-Y, Lopez R, Hunter  
623 S. 2014. InterProScan 5: genome-scale protein function classification. *Bioinformatics* 30:1236–  
624 1240.
- 625 43. Haft DH, Selengut JD, White O. 2003. The TIGRFAMs database of protein families. *Nucleic*  
626 *Acids Res* 31:371–373.
- 627 44. Overbeek R, Olson R, Pusch GD, Olsen GJ, Davis JJ, Disz T, Edwards RA, Gerdes S, Parrello B,  
628 Shukla M, Vonstein V, Wattam AR, Xia F, Stevens R. 2014. The SEED and the Rapid Annotation  
629 of microbial genomes using Subsystems Technology (RAST). *Nucleic Acids Res* 42:D206–D214.
- 630 45. Galperin MY, Makarova KS, Wolf YI, Koonin EV. 2015. Expanded microbial genome coverage  
631 and improved protein family annotation in the COG database. *Nucleic Acids Res* 43:D261–

632 D269.

633 46. Langmead B, Salzberg SL. 2012. Fast gapped-read alignment with Bowtie 2. Nat Methods  
634 9:357–359.

635 47. Liao Y, Smyth GK, Shi W. 2014. featureCounts: an efficient general purpose program for  
636 assigning sequence reads to genomic features. Bioinformatics 30:923–930.

637 48. Love MI, Huber W, Anders S. 2014. Moderated estimation of fold change and dispersion for  
638 RNA-seq data with DESeq2. Genome Biol 15:550.

639 49. R Core Team. 2017. R: a language and environment for statistical computing. R Foundation  
640 for Statistical Computing, Vienna, Austria.

641 50. Abicht HK, Mancini S, Karnachuk OV, Solioz M. 2011. Genome sequence of  
642 *Desulfosporosinus* sp. OT, an acidophilic sulfate-reducing bacterium from copper mining waste  
643 in Norilsk, Northern Siberia. J Bacteriol 193:6104–6105.

644 51. Pester M, Brambilla E, Alazard D, Rattei T, Weinmaier T, Han J, Lucas S, Lapidus A, Cheng J-  
645 F, Goodwin L, Pitluck S, Peters L, Ovchinnikova G, Teshima H, Detter JC, Han CS, Tapia R, Land  
646 ML, Hauser L, Kyrpides NC, Ivanova NN, Pagani I, Huntmann M, Wei C-L, Davenport KW,  
647 Daligault H, Chain PSG, Chen A, Mavromatis K, Markowitz V, Szeto E, Mikhailova N, Pati A,  
648 Wagner M, Woyke T, Ollivier B, Klenk H-P, Spring S, Loy A. 2012. Complete genome sequences  
649 of *Desulfosporosinus orientis* DSM765<sup>T</sup>, *Desulfosporosinus youngiae* DSM17734<sup>T</sup>,  
650 *Desulfosporosinus meridiei* DSM13257<sup>T</sup>, and *Desulfosporosinus acidiphilus* DSM22704<sup>T</sup>. J  
651 Bacteriol 194:6300–6301.

652 52. Abu Laban N, Tan B, Dao A, Foght J. 2015. Draft genome sequence of uncultivated  
653 *Desulfosporosinus* sp. strain Tol-M, obtained by stable isotope probing using [<sup>13</sup>C<sub>6</sub>]toluene.  
654 Genome Announc 3:e01422–14.

655 53. Petzsch P, Poehlein A, Johnson DB, Daniel R, Schlömann M, Mühling M. 2015. Genome  
656 sequence of the moderately acidophilic sulfate-reducing firmicute *Desulfosporosinus*  
657 *acididurans* (Strain M1<sup>T</sup>). Genome Announc 3:e00881–15.

- 658 54. Mardanov AV, Panova IA, Beletsky AV, Avakyan MR, Kadnikov VV, Antsiferov DV, Banks D,  
659 Frank YA, Pimenov NV, Ravin NV, Karnachuk OV. 2016. Genomic insights into a new acidophilic,  
660 copper-resistant *Desulfosporosinus* isolate from the oxidized tailings area of an abandoned gold  
661 mine. FEMS Microbiol Ecol 92:fiw111.
- 662 55. Stoddard SF, Smith BJ, Hein R, Roller BRK, Schmidt TM. 2015. *rrnDB*: improved tools for  
663 interpreting rRNA gene abundance in bacteria and archaea and a new foundation for future  
664 development. Nucleic Acids Res 43:D593–D598.
- 665 56. Stackebrandt E, Ebers J. 2006. Taxonomic parameters revisited: tarnished gold standards.  
666 Microbiol Today 33:152–155.
- 667 57. Rabus R, Venceslau SS, Wöhlbrand L, Voordouw G, Wall JD, Pereira IAC. 2015. A post-  
668 genomic view of the ecophysiology, catabolism and biotechnological relevance of sulphate-  
669 reducing prokaryotes. Adv Microb Physiol 66:55–321.
- 670 58. Huang CJ, Barrett EL. 1991. Sequence analysis and expression of the *Salmonella*  
671 *typhimurium* *asr* operon encoding production of hydrogen sulfide from sulfite. J Bacteriol  
672 173:1544–1553.
- 673 59. Weghoff MC, Bertsch J, Müller V. 2015. A novel mode of lactate metabolism in strictly  
674 anaerobic bacteria. Environ Microbiol 17:670–677.
- 675 60. Zhang Y, Jiang T, Sheng B, Long Y, Gao C, Ma C, Xu P. 2016. Coexistence of two D-lactate-  
676 utilizing systems in *Pseudomonas putida* KT2440. Environ Microbiol Rep 8:699–707.
- 677 61. Desguin B, Goffin P, Viaene E, Kleerebezem M, Martin-Diaconescu V, Maroney MJ, Declercq  
678 J-P, Soumillion P, Hols P. 2014. Lactate racemase is a nickel-dependent enzyme activated by a  
679 widespread maturation system. Nat Commun 5:3615.
- 680 62. Pierce E, Xie G, Barabote RD, Saunders E, Han CS, Detter JC, Richardson P, Brettin TS, Das  
681 A, Ljungdahl LG, Ragsdale SW. 2008. The complete genome sequence of *Moorella*  
682 *thermoacetica* (f. *Clostridium thermoaceticum*). Environ Microbiol 10:2550–2573.
- 683 63. Greening C, Biswas A, Carere CR, Jackson CJ, Taylor MC, Stott MB, Cook GM, Morales SE.  
684 2016. Genomic and metagenomic surveys of hydrogenase distribution indicate H<sub>2</sub> is a widely

685 utilised energy source for microbial growth and survival. ISME J 10:761-777.

686 64. Schmidt A, Müller N, Schink B, Schleheck D. 2013. A proteomic view at the biochemistry of  
687 syntrophic butyrate oxidation in *Syntrophomonas wolfei*. PLoS One 8:e56905.

688 65. Buckel W, Thauer RK. 2013. Energy conservation via electron bifurcating ferredoxin  
689 reduction and proton/Na<sup>+</sup> translocating ferredoxin oxidation. Biochim Biophys Acta 1827:94-  
690 113.

691 66. Jacks G, Norrström A-C. 2004. Hydrochemistry and hydrology of forest riparian wetlands.  
692 For Ecol Manage 196:187-197.

693 67. Knorr K-H, Lischeid G, Blodau C. 2009. Dynamics of redox processes in a minerotrophic fen  
694 exposed to a water table manipulation. Geoderma 153:379-392.

695 68. Knorr K-H, Blodau C. 2009. Impact of experimental drought and rewetting on redox  
696 transformations and methanogenesis in mesocosms of a northern fen soil. Soil Biol Biochem  
697 41:1187-1198.

698 69. Frei S, Knorr K-H, Peiffer S, Fleckenstein JH. 2012. Surface micro-topography causes hot  
699 spots of biogeochemical activity in wetland systems: a virtual modeling experiment. J Geophys  
700 Res Biogeosciences 117:G00N12.

701 70. Mojardín L, Salas M. 2016. Global transcriptional analysis of virus-host interactions between  
702 phage φ29 and *Bacillus subtilis*. J Virol 90:9293-9304.

703 71. Bergkessel M, Basta DW, Newman DK. 2016. The physiology of growth arrest: uniting  
704 molecular and environmental microbiology. Nat Rev Microbiol 14:549-562.

705 72. Teira E, Lekunberri I, Gasol JM, Nieto-Cid M, Alvarez-Salgado XA, Figueiras FG. 2007.  
706 Dynamics of the hydrocarbon-degrading *Cycloclasticus* bacteria during mesocosm-simulated oil  
707 spills. Environ Microbiol 9:2551-2562.

708 73. Newton RJ, Huse SM, Morrison HG, Peake CS, Sogin ML, McLellan SL. 2013. Shifts in the  
709 microbial community composition of Gulf Coast beaches following beach oiling. PLoS One  
710 8:e74265.

711 74. Vergin K, Done B, Carlson C, Giovannoni S. 2013. Spatiotemporal distributions of rare  
712 bacterioplankton populations indicate adaptive strategies in the oligotrophic ocean. *Aquat*  
713 *Microb Ecol* 71:1–13.

714 75. Schmalenberger A, Drake HL, Küsel K. 2007. High unique diversity of sulfate-reducing  
715 prokaryotes characterized in a depth gradient in an acidic fen. *Environ Microbiol* 9:1317–1328.

716 76. Küsel K, Blöthe M, Schulz D, Reiche M, Drake HL. 2008. Microbial reduction of iron and  
717 porewater biogeochemistry in acidic peatlands. *Biogeosciences* 5:1537–1549.

718 77. Reiche M, Hädrich A, Lischeid G, Küsel K. 2009. Impact of manipulated drought and heavy  
719 rainfall events on peat mineralization processes and source-sink functions of an acidic fen. *J*  
720 *Geophys Res Biogeosciences* 114:G02021.

721 78. Overkamp W, Ercan O, Herber M, van Maris AJA, Kleerebezem M, Kuipers OP. 2015.  
722 Physiological and cell morphology adaptation of *Bacillus subtilis* at near-zero specific growth  
723 rates: a transcriptome analysis. *Environ Microbiol* 17:346–363.

724 79. Goffin P, van de Bunt B, Giovane M, Leveau JHJ, Höppener-Ogawa S, Teusink B, Hugenholtz  
725 J. 2010. Understanding the physiology of *Lactobacillus plantarum* at zero growth. *Mol Syst Biol*  
726 6:413.

727 80. Rolfe MD, Rice CJ, Lucchini S, Pin C, Thompson A, Cameron ADS, Alston M, Stringer MF,  
728 Betts RP, Baranyi J, Peck MW, Hinton JCD. 2012. Lag phase is a distinct growth phase that  
729 prepares bacteria for exponential growth and involves transient metal accumulation. *J Bacteriol*  
730 194:686–701.

731 81. Pirt SJ. 1965. The maintenance energy of bacteria in growing cultures. *Proc R Soc B Biol Sci*  
732 163:224–231.

733 82. Ercan O, Bisschops MMM, Overkamp W, Jørgensen TR, Ram AF, Smid EJ, Pronk JT, Kuipers  
734 OP, Daran-Lapujade P, Kleerebezem M. 2015. Physiological and transcriptional responses of  
735 different industrial microbes at near-zero specific growth rates. *Appl Environ Microbiol* 81:5662–  
736 5670.

737 83. Tijhuis L, Van Loosdrecht MC, Heijnen JJ. 1993. A thermodynamically based correlation for

738 maintenance gibbs energy requirements in aerobic and anaerobic chemotrophic growth.

739 Biotechnol Bioeng 42:509–519.

740 84. Davidson MM, Bisher ME, Pratt LM, Fong J, Southam G, Pfiffner SM, Reches Z, Onstott TC.

741 2009. Sulfur isotope enrichment during maintenance metabolism in the thermophilic sulfate-

742 reducing bacterium *Desulfotomaculum putei*. Appl Environ Microbiol 75:5621–5630.

743 85. Kvint K, Nachin L, Diez A, Nyström T. 2003. The bacterial universal stress protein: function

744 and regulation. Curr Opin Microbiol 6:140–145.

745 86. Jan G, Leverrier P, Pichereau V, Boyaval P. 2001. Changes in protein synthesis and

746 morphology during acid adaptation of *Propionibacterium freudenreichii*. Appl Environ Microbiol

747 67:2029–2036.

748 87. Frees D, Vogensen FK, Ingmer H. 2003. Identification of proteins induced at low pH in

749 *Lactococcus lactis*. Int J Food Microbiol 87:293–300.

750 88. Sánchez B, Champomier-Vergès M-C, Collado MDC, Anglade P, Baraige F, Sanz Y, de los

751 Reyes-Gavilán CG, Margolles A, Zagorec M. 2007. Low-pH adaptation and the acid tolerance

752 response of *Bifidobacterium longum* biotype longum. Appl Environ Microbiol 73:6450–6459.

753 89. Silva J, Carvalho AS, Ferreira R, Vitorino R, Amado F, Domingues P, Teixeira P, Gibbs PA.

754 2005. Effect of the pH of growth on the survival of *Lactobacillus delbrueckii* subsp. *bulgaricus*

755 to stress conditions during spray-drying. J Appl Microbiol 98:775–782.

756 90. Lund P, Tramonti A, De Biase D. 2014. Coping with low pH: molecular strategies in

757 neutralophilic bacteria. FEMS Microbiol Rev 38:1091–1125.

# 758 **Figures**

## 759 **Fig. 1**

760 Metabolic model of *Desulfosporosinus* sp. MAG SbF1. Gene expression stimulated by specific  
761 substrates in combination with sulfate is indicated by coloured points. Paralogous genes are  
762 indicated by an underscore followed by a number. Plus signs indicates proposed protein  
763 complexes. Details for all genes are given in Table S1 and transcription patterns are shown in  
764 Fig. 4. For the citric acid cycle and anaplerotic reactions, carriers of reducing equivalents and  
765 further by-products are not shown. The following abbreviations were used. X: unknown  
766 reducing equivalent carrier, e.g., NAD<sup>+</sup> or ferredoxin. WL: Wood-Ljungdahl pathway consisting  
767 of enzymes encoded by the *acs* operon, MetF, F<sub>0</sub>F<sub>1</sub>, F<sub>4</sub>H<sub>4</sub>, and F<sub>4</sub>H<sub>2</sub>. TCA: citric acid cycle. FDH:  
768 formate dehydrogenase. Hase: hydrogenase. NDH-1: NADH dehydrogenase 1. LDH: lactate  
769 dehydrogenase.

## 770 **Fig. 2**

771 (a) Time-resolved absolute abundance of the *Desulfosporosinus* population (in black) as  
772 compared to all Bacteria and *Archaea* (in grey) in anoxic peat soil microcosms under various in-  
773 situ like conditions as determined by quantitative PCR (modified from (5)). Error bars represent  
774 one standard deviation of the mean (n=3; n=2 for propionate with sulfate stimulation, all days,  
775 and butyrate with sulfate stimulation, day 50). (b) Corresponding overall transcriptional  
776 changes (mRNA of all CDS) of *Desulfosporosinus* sp. MAG SbF1 in the same anoxic microcosms.  
777 Error bars represent one standard deviation of the mean (n=3; n=2 for propionate with sulfate  
778 stimulation).

## 779 **Fig. 3**

780 Time-resolved transcriptional changes of selected genes representing the sulfate-reduction  
781 pathway (*sat*, *dsrA*), ribosomal proteins of the large (*rplA*) and small subunit (*rpsC*), cell division  
782 (*ftsZ*), DNA replication (*gyrB*), and peptidoglycan synthesis (*murA*). Panels represent the  
783 various substrate incubations: initial, initial peat soil to set up peat microcosms; +/-S,  
784 incubations with or without external sulfate. The size and color of the dots represent average  
785 FPKM values of the respective normalised gene expression.

## 786 **Fig. 4**

787 Transcription patterns of whole pathways and central enzyme complexes involved in the  
 788 carbon and energy metabolism of *Desulfosporosinus* sp. MAG SbF1 under *in situ*-like conditions.  
 789 In addition, transcription patterns of general stress response proteins are shown. Mean  
 790 abundance for the native soil (—) and each incubation treatment and time point is shown.  
 791 Supplemented substrates are indicated by initials and addition of external sulfate is depicted  
 792 by -S/+S (columns). Abundance values are normalised variance-stabilised counts  $x$ , which were  
 793 scaled from 0 to 1 for each CDS using the formula  $[x - \min(x)] / \max[x - \min(x)]$ . Incompletely  
 794 assembled genes are indicated by \_a, \_b, and \_c.



[illegible]

**Fig. 2.**

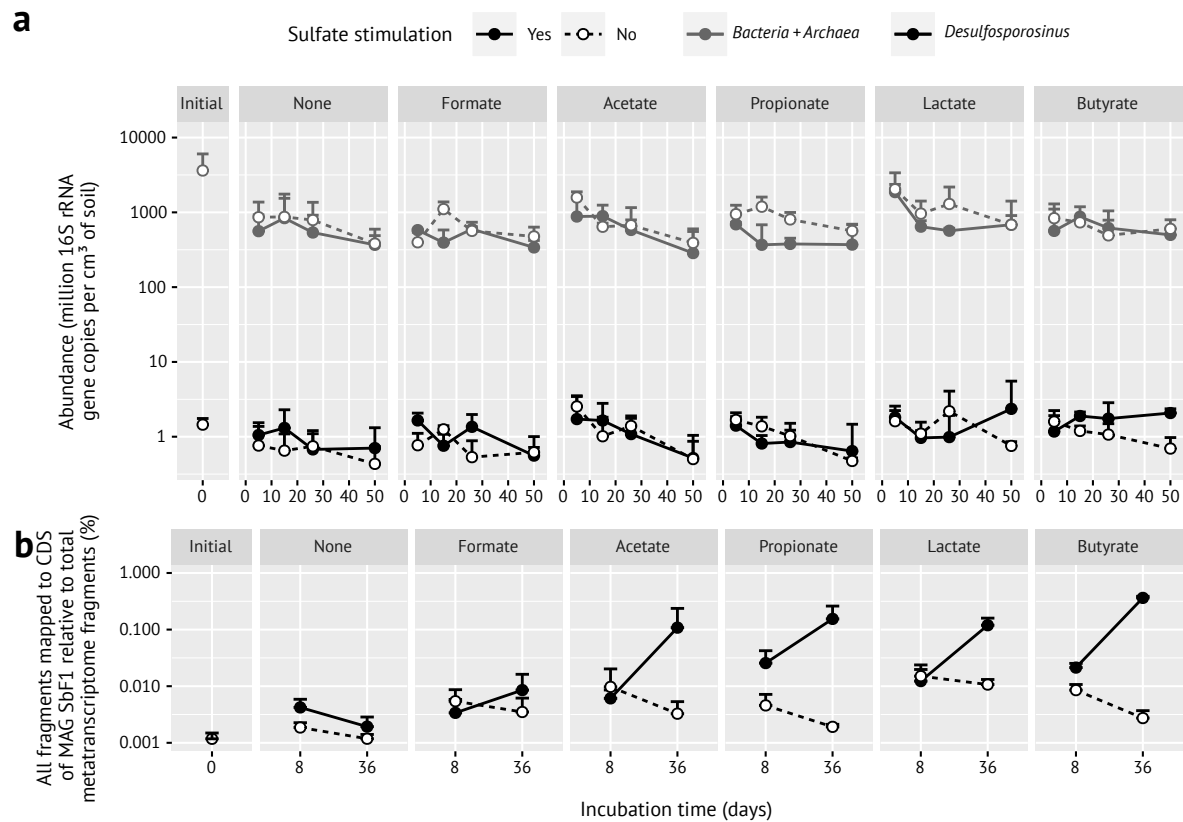

**Fig. 3.**

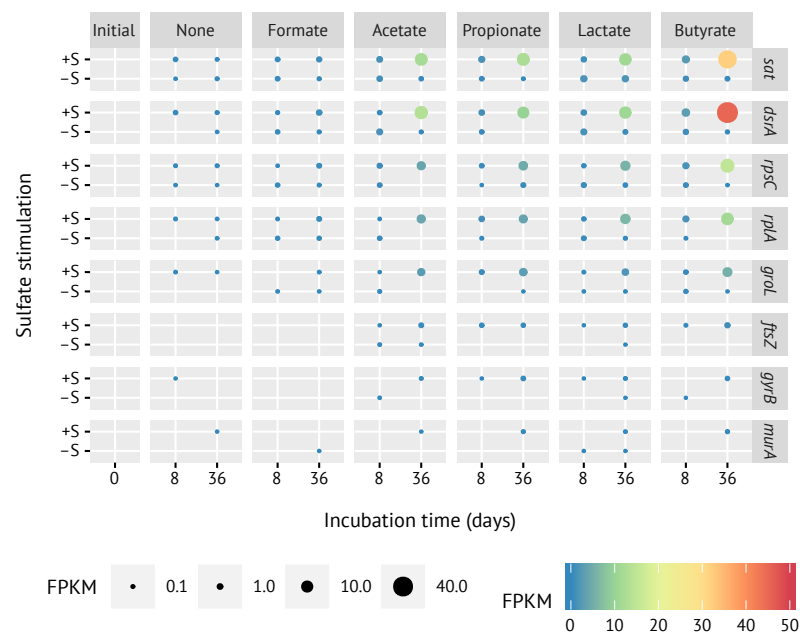



# 1 **Supplementary Information**

## 2 **Supplementary Methods**

### 3 **Calculation of minimum sulfate turnover for maintenance**

4 The minimum sulfate turnover required for maintenance was calculated according to the  
 5 species-independent Arrhenius equation outlined in (1). Here,  $m_e = Ae^{-E_a/RT}$  with  $m_e$  as the  
 6 free energy consumption rate for zero growth,  $A$  as a constant factor for anaerobic  
 7 microorganisms ( $4.99 \times 10^{12}$  kJ g d.wt.<sup>-1</sup> d<sup>-1</sup>),  $E_a$  as constant activation energy (69.4 kJ mol<sup>-1</sup>),  
 8  $R$  as the universal gas constant (8.314 J mol<sup>-1</sup> K<sup>-1</sup>), and  $T$  as temperature in K. We used a  
 9 temperature of 14 °C (288.15 K) for our calculations because this was the temperature at  
 10 which the incubations were performed. The resulting  $m_e$  was converted to cell-specific sulfate  
 11 reduction rates required for maintenance based on the energy yield of a sulfate reducer when  
 12 converting lactate to acetate (-160.4 kJ mol sulfate<sup>-1</sup>) (2) and a conversion factor of dry weight  
 13 biomass to cell numbers of  $2.9 \times 10^{13}$  g d.wt. cell<sup>-1</sup> (3).

# 14    **Supplementary Tables**

## 15    **Table S1**

16    Summary of all genomic features in *Desulfosporosinus* sp. MAG SbF1. Genes encoding the  
 17    energy metabolism or central cellular functions are given first. COG class IDs were assigned by  
 18    MaGe (Cognitor, [www.ncbi.nlm.nih.gov/COG/](http://www.ncbi.nlm.nih.gov/COG/)). bactNOG and NOG IDs were assigned by best-  
 19    match principle (4, 5). Spearman's rank correlation is given for each gene's normalized  
 20    transcript counts as compared to the sum of normalized mRNA counts (FDR-adjusted *p*-values  
 21    are indicated by asterisks: \*, < 0.05; \*\*, < 0.01; \*\*\*, < 0.001). Expression clusters  
 22    represent the clusters assigned by correlation and hierarchical clustering analysis. The next  
 23    five columns are log<sub>2</sub> fold-changes of expression levels after 36 days of incubation in the  
 24    sulfate-stimulated microcosms (i.e., substrate vs no-substrate-control). Missing fold-changes  
 25    are due to all counts being zero in both compared treatments. Ranks are based on mean  
 26    fragments per kilobase per million total fragments (FPKM). Also here, only data of sulfate-  
 27    stimulated microcosms after 36 days of incubation are shown in addition to the native soil.  
 28    Missing ranks indicate that expression was never detected in any replicate. Fragmented, i.e.,  
 29    mainly incompletely assembled genes are indicated by \_a, \_b, and \_c. A <sup>1</sup> or <sup>2</sup> in the strand  
 30    column indicates that this CDS is either the first or last on a scaffold, respectively (depending  
 31    on the reading frame).

## 32    **Table S2**

33    Characteristics and coverage of all scaffolds belonging to *Desulfosporosinus* sp. MAG SbF1. The  
 34    two scaffolds with the highest coverage encode the 23S and 16S rRNA genes, respectively.

## 35    **Table S3**

36    Expression levels of selected CDS in the analysed anoxic peat soil microcosms given in FPKM  
 37    (mean ± one standard deviation). Loci are sorted as in Table S1. Headers display the individual  
 38    treatments used in the peat soil microcosms: without and with external sulfate added;  
 39    amended substrate; and days of incubation.

## 40 **Supplementary Figures**

### 41 **Fig. S1**

42 Differential coverage plots of assembled scaffolds with *Desulfosporosinus* sp. MAG SbF1  
43 scaffolds highlighted by black circles. The average coverage per scaffold in the SIP  
44 metagenome is visualized without (a) and with (b) G+C content transformation (see Materials  
45 and Methods). Taxonomic affiliation is indicated by color and based on BLAST as described  
46 previously (6). White circles represent unclassified scaffolds. Only scaffolds >10 000 nt length  
47 are shown, except when belonging to SbF1. Scaffolds encoding selected genes in SbF1 are  
48 labelled accordingly.

### 49 **Fig. S2**

50 (a) Maximum likelihood 16S rRNA gene tree of species belonging to the genera  
51 *Desulfosporosinus* and *Desulfitobacterium*. Branch supports of  $\geq 0.9$  and  $\geq 0.7$  are indicated by  
52 filled and open circles, respectively. GenBank accession numbers are given in parentheses. (b)  
53 Bayesian inference phylogenomic tree showing the phylogenetic placement of  
54 *Desulfosporosinus* sp. MAG SbF1. All branches were supported >0.9 (filled circles). The tree  
55 was rooted against genomes from the *Acidobacteria*, *Proteobacteria*, and *Verrucomicrobia* (not  
56 shown). Genome accession numbers are given in parentheses.

### 57 **Fig. S3**

58 Two-way average amino and nucleic acid identities between *Desulfosporosinus* and  
59 *Desulfitobacterium* species genomes (in%, written into cells). The dendrogram is based on Fig.  
60 S2b.

## 61 **Fig. S4**

62 Time-resolved 16S rRNA copies of the low-abundance *Desulfosporosinus* population as  
 63 determined by quantitative PCR, modified from (7). Error bars are  $\pm$  one standard deviation  
 64 (n=3; n=2 for propionate with sulfate stimulation, all days, and butyrate with sulfate  
 65 stimulation, day 50).(7). Solid lines and symbols represent sulfate-stimulated microcosms  
 66 whereas dashed lines and open symbols represent control microcosms without external sulfate.  
 67 Panels represent the various substrate incubations, initial stands for initial peat soil.

## 68 **Fig. S5**

69 Time-resolved changes of all unambiguously identified genes related to cell division (*ftsZ*, *ftsA*,  
 70 *ftsK*, *ftsW*, *minE*), DNA replication (*gyrB*, *gyrA*, *dnaG*, *dnaE*, *holA*, *dnaC*, *priA*), and cell envelope  
 71 biogenesis (*murABCDEFGI*, *ddl*, *alr*, *mraY*, Table S1); *dsrA* is included as reference, analogous  
 72 to Fig. 3. Panels represent the various substrate incubations: initial, initial peat soil to set up  
 73 peat microcosms; +/-S, incubations with or without external sulfate. The size and color of the  
 74 dots represent average FPKM values of the respective normalized gene expression.



## 75 **Supplementary References**

- 76 1. Harder J. 1997. Species-independent maintenance energy and natural population sizes.  
77 FEMS Microbiol Ecol 23:39–44.
- 78 2. Muyzer G, Stams AJM. 2008. The ecology and biotechnology of sulphate-reducing bacteria.  
79 Nat Rev Microbiol 6:441–454.
- 80 3. Neidhardt FC, Ingraham JL, Schaechter M. 1990. Physiology of the bacterial cell: a molecular  
81 approach. Sinauer Associates, Sunderland, MA, USA.
- 82 4. Huerta-Cepas J, Szklarczyk D, Forslund K, Cook H, Heller D, Walter MC, Rattei T, Mende DR,  
83 Sunagawa S, Kuhn M, Jensen LJ, Mering C von, Bork P. 2016. eggNOG 4.5: a hierarchical  
84 orthology framework with improved functional annotations for eukaryotic, prokaryotic and viral  
85 sequences. Nucleic Acids Res 44:D286–D293.
- 86 5. Hausmann B, Pelikan C, Herbold CW, Köstlbacher S, Albertsen M, Eichorst SA, Glavina Del Rio  
87 T, Huemer M, Nielsen PH, Rattei T, Stingl U, Tringe SG, Trojan D, Wentrup C, Woebken D, Pester  
88 M, Loy A. 2018. Peatland *Acidobacteria* with a dissimilatory sulfur metabolism. ISME J.
- 89 6. Albertsen M, Hugenholtz P, Skarshewski A, Nielsen KL, Tyson GW, Nielsen PH. 2013. Genome  
90 sequences of rare, uncultured bacteria obtained by differential coverage binning of multiple  
91 metagenomes. Nat Biotechnol 31:533–538.
- 92 7. Hausmann B, Knorr K-H, Schreck K, Tringe SG, Glavina del Rio T, Loy A, Pester M. 2016.  
93 Consortia of low-abundance bacteria drive sulfate reduction-dependent degradation of  
94 fermentation products in peat soil microcosms. The ISME Journal 10:2365–2375.

**Fig. S1.**

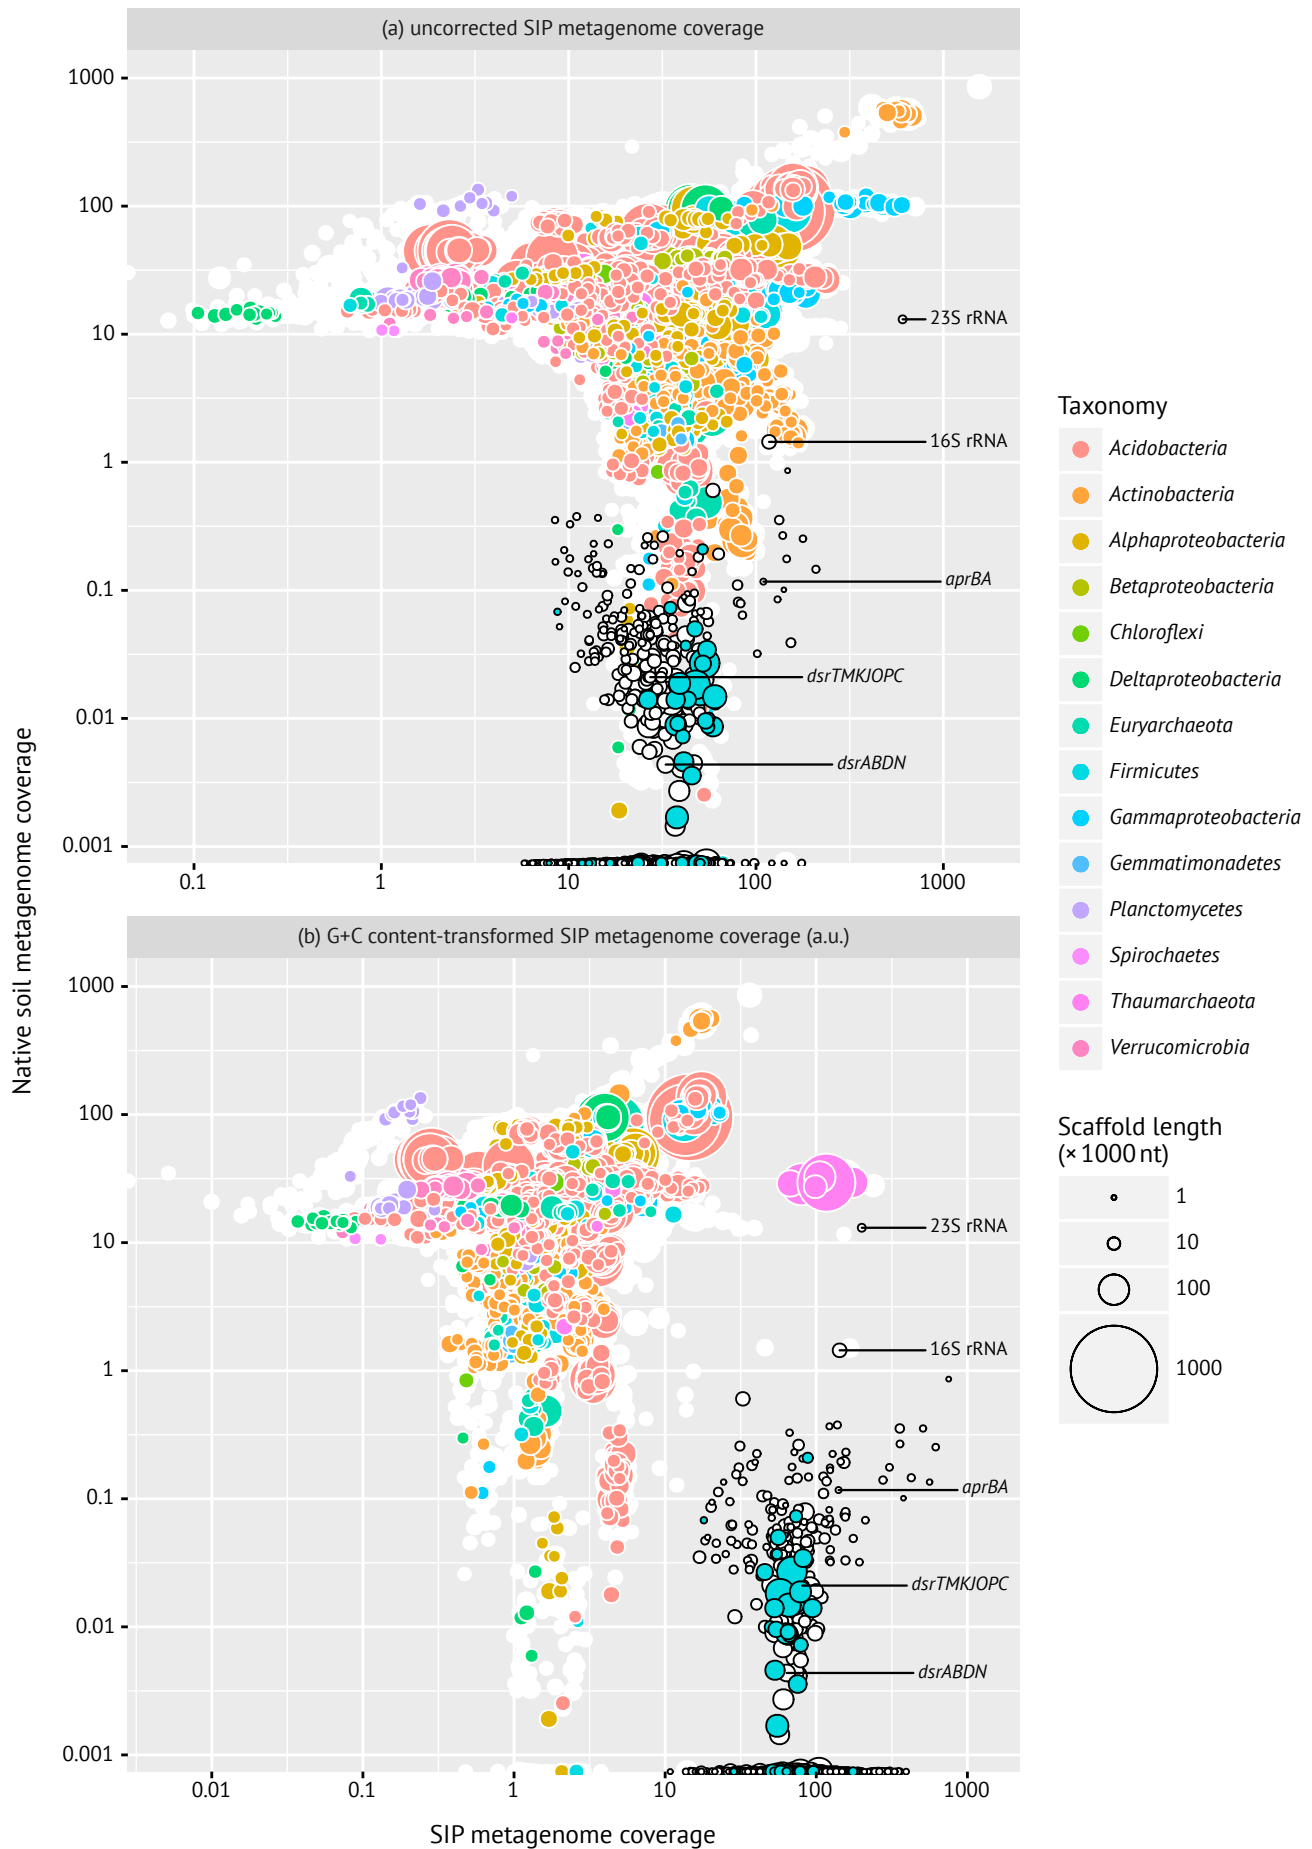

**Fig. S2.**

**(a) 16S rRNA gene**

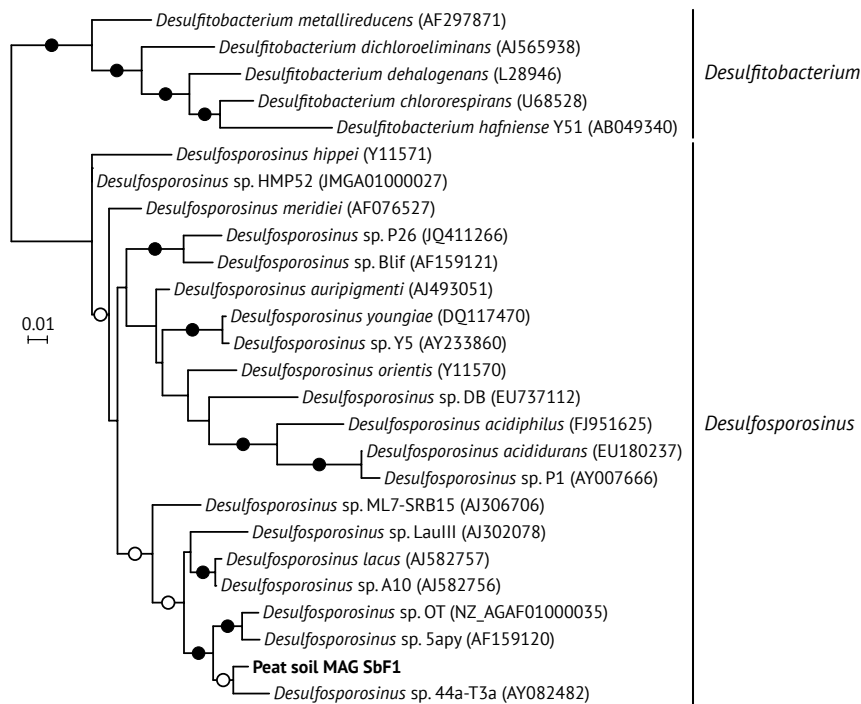

**(b) genome**

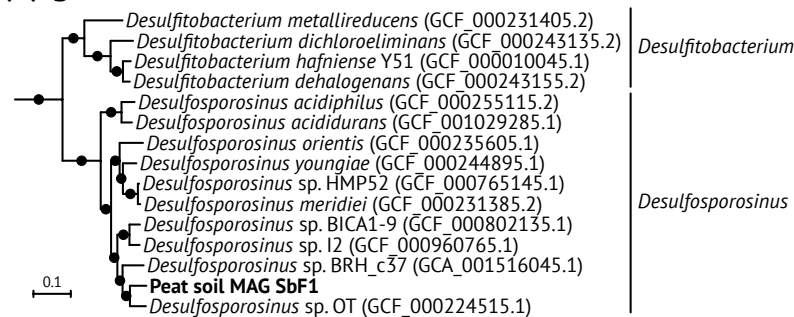

**Fig. S3.**

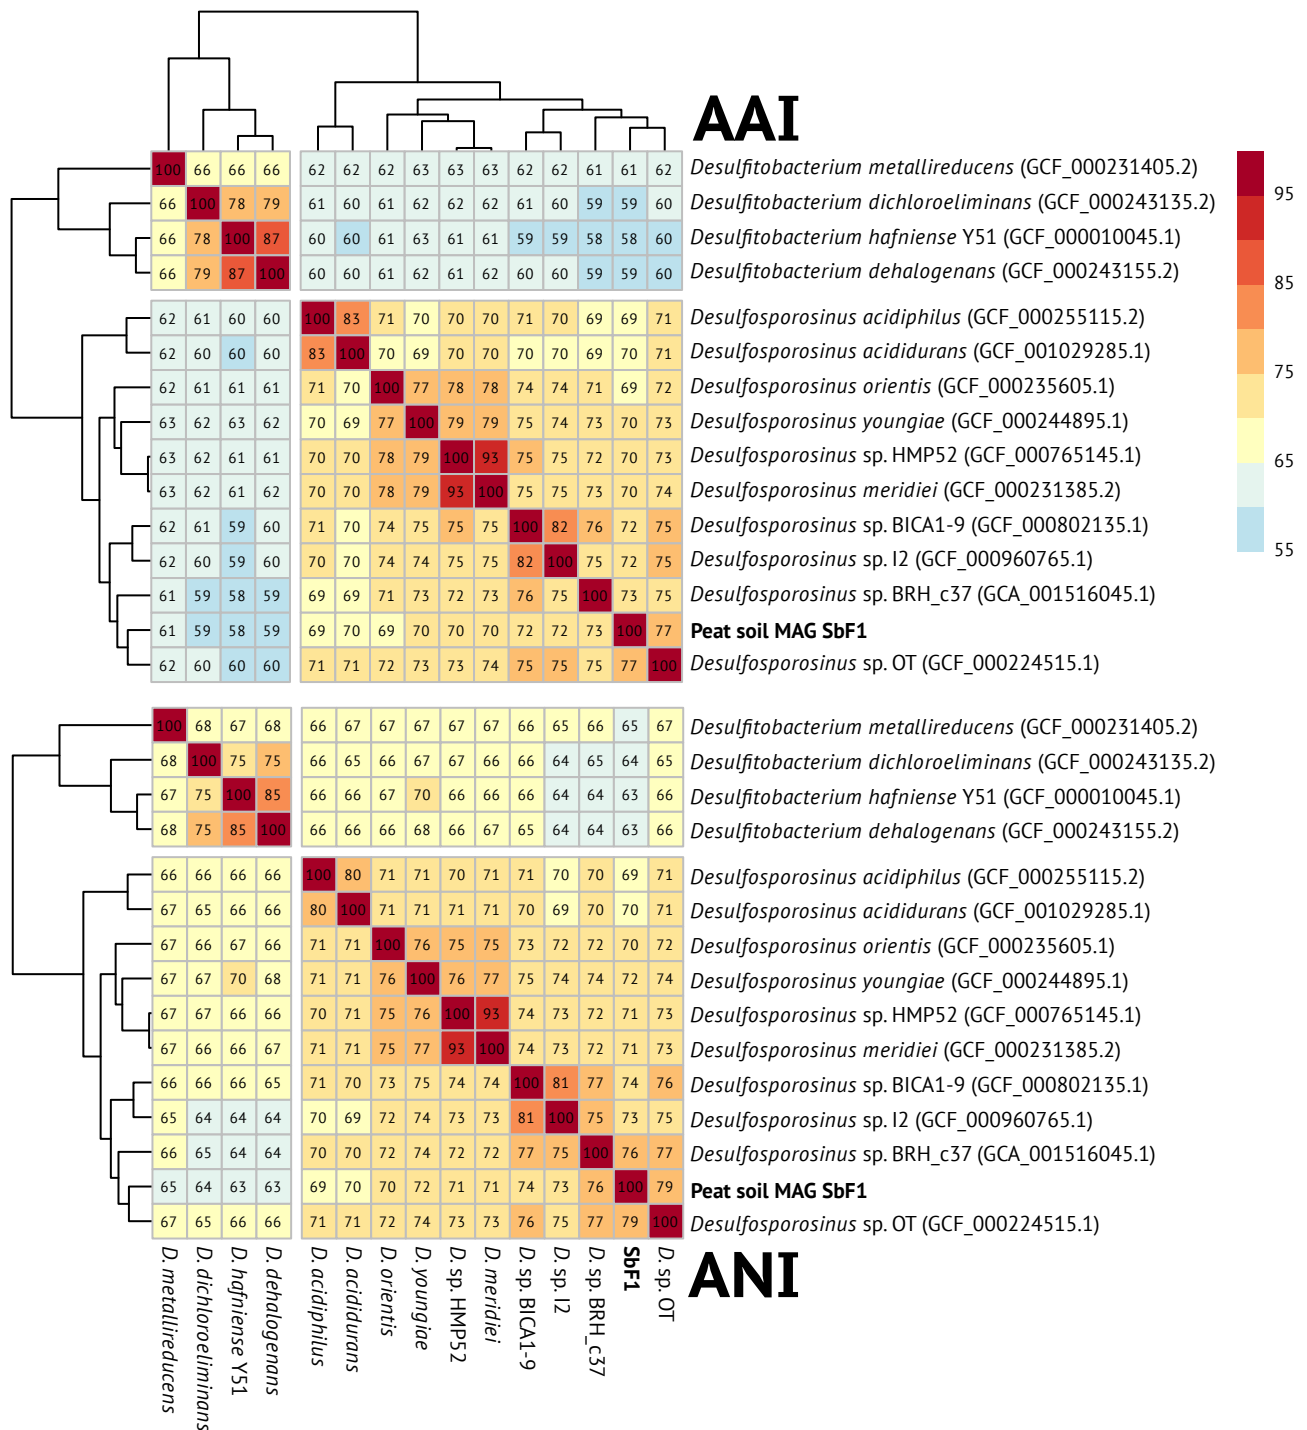

**Fig. S4.**

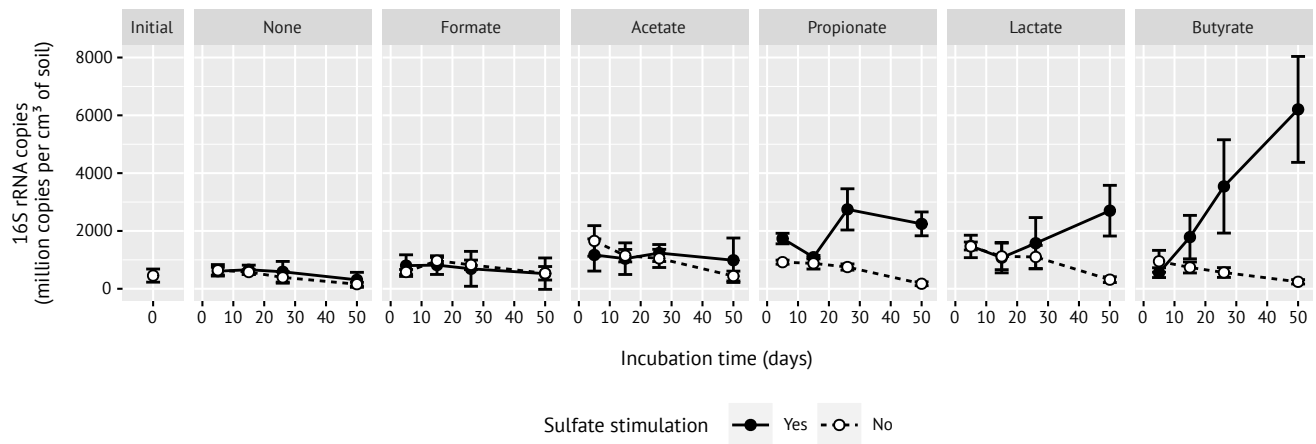

**Fig. S5.**

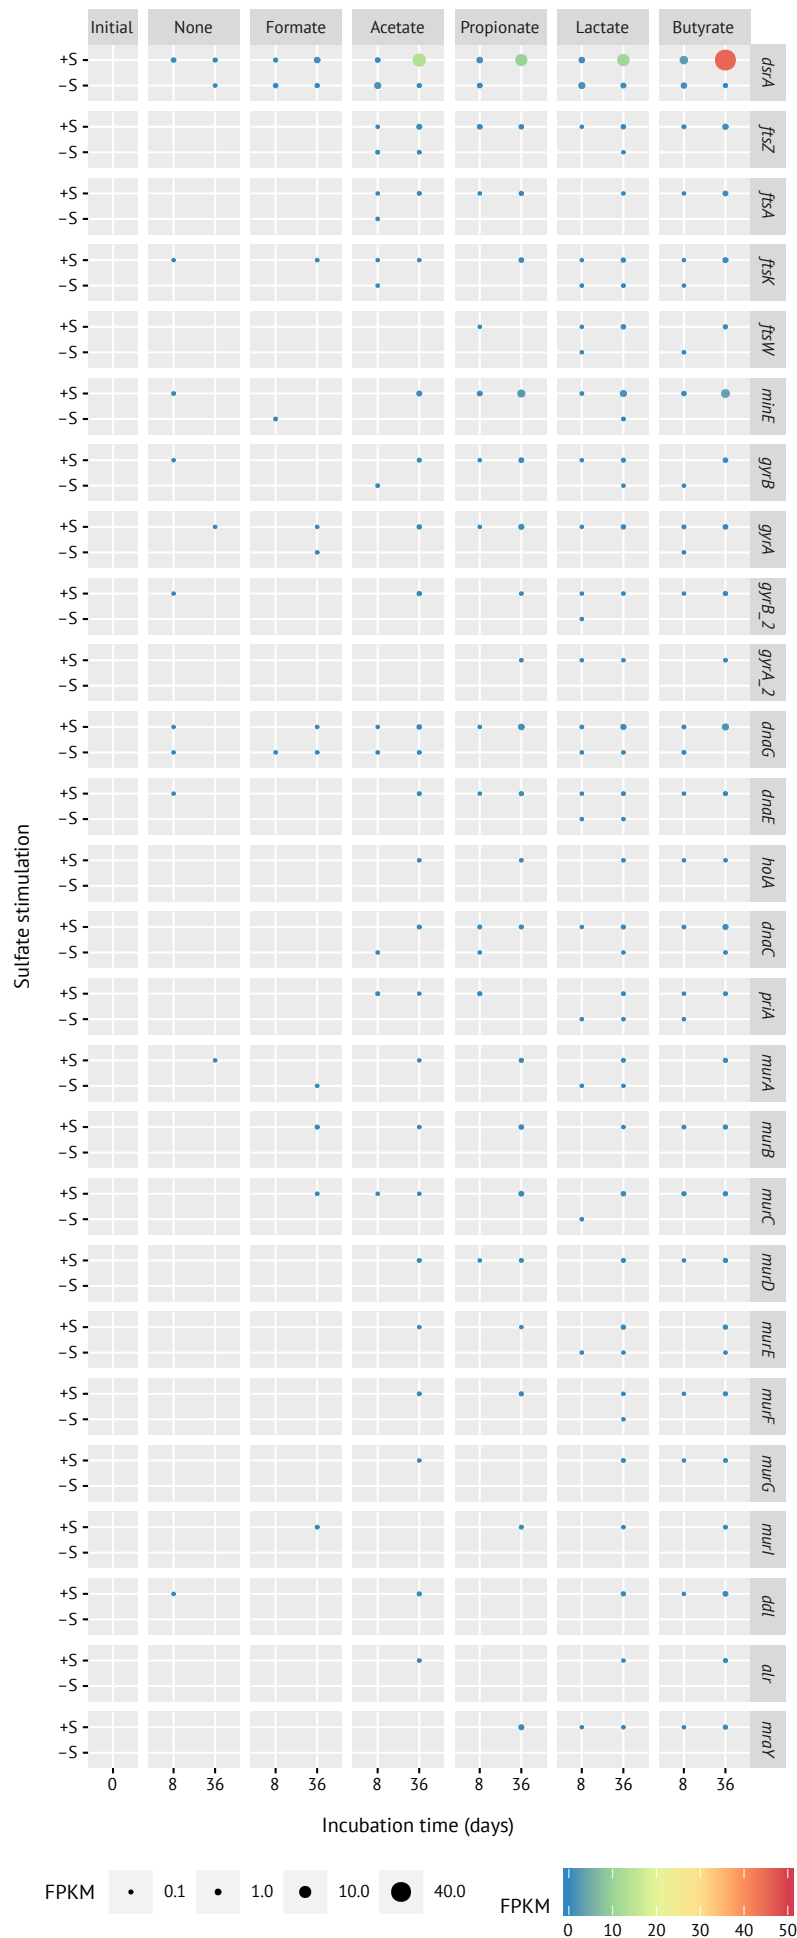

Source: http://biorxiv.org/content/10.1101/284430v2.full.pdf
